# Supplementary material
Source: PubMed Central journal article supplement (PMC4012591)
Supplement: supp_pp.114.237891_237891Supplemental_files.pdf [file supp_pp.114.237891_237891Supplemental_files.pdf]

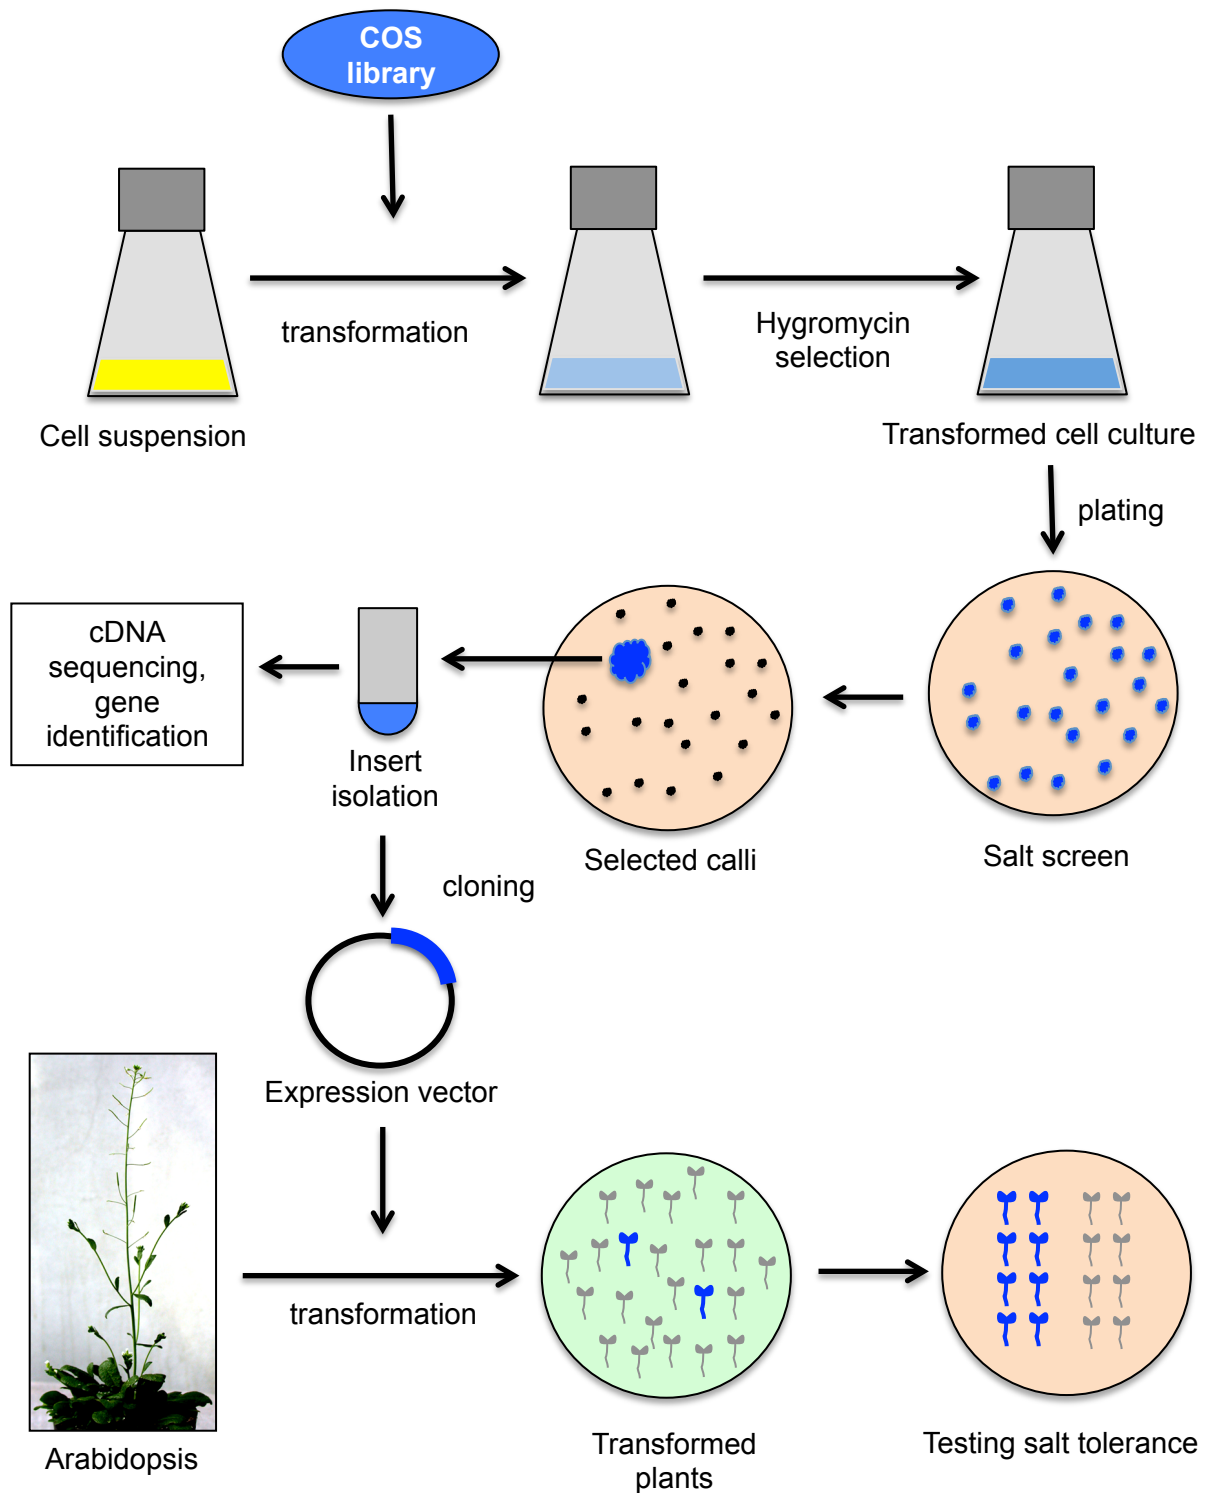

**Figure S1. Schematic illustration of COS screening and cloning strategy.**

Arabidopsis cell suspension was transformed with the COS cDNA library. Salt tolerant calli were selected in the presence of 5mM estradiol and used for DNA isolation and identification of cDNAs carried by the COS expression vector T-DNA insertions. The identified HSF4A cDNA was cloned into a plant expression vector pER8GW, and transformed into Arabidopsis to verify its capacity to improve stress tolerance in plants.

|                         |                |                                                              | <b>DBD</b>              |                                                                               |                  |                |              |        |     |
|-------------------------|----------------|--------------------------------------------------------------|-------------------------|-------------------------------------------------------------------------------|------------------|----------------|--------------|--------|-----|
| Arabidopsis             | MDENNHGVS-SSSL | PPFLTKTYEMVDDSSSDSIVSWSQSNKSFIVWNPPEFSRDLLPRFF               | 59                      |                                                                               |                  |                |              |        |     |
| Eutrema                 | MDESNHGGS-SSSL | PPFLTKTYEMVDDSSSDSIVSWSQSNKSFIVWNPPEFSRGLLPRFF               | 59                      |                                                                               |                  |                |              |        |     |
| Brassica                | MDESSHGSSSTL   | PPFLTKTYEMVDDSSSDSIVSWSQSNKSFIVWNPPEFSRDLLPKFF               | 60                      |                                                                               |                  |                |              |        |     |
| Vitis                   | MDE---         | SPGSSNSPPPFLTKTYEMVDDPTTDSIVSWSQTNKSFIVWNPEDFSRDLLPRFF       | 57                      |                                                                               |                  |                |              |        |     |
| Populus                 | MDE---         | SQGTNSLPPFLAKAYEMVDDPSSSDSIVSWSQNNKSFVWNPPEFARDLLPRFF        | 57                      |                                                                               |                  |                |              |        |     |
| Citrus                  | MDD---         | GQGSSNSLPPFLAKTYEMVDDSSDLDLTVSWSSSNKSFIVWNPPEFARDLLPKYF      | 57                      |                                                                               |                  |                |              |        |     |
|                         |                |                                                              |                         | ** : . . * . * **** : * : ***** : * : ***** . ***** : * : * **** : *          |                  |                |              |        |     |
|                         |                |                                                              |                         |                                                                               |                  |                |              |        |     |
| Arabidopsis             |                | KHNNFSSFIRQLNTYGFRKADPEQWEFANDDFVRGQPHLMKNIHRRKPVHSHSLPNLQAO | 119                     |                                                                               |                  |                |              |        |     |
| Eutrema                 |                | KHNNFSSFIRQLNTYGFRKADPEQWEFANEDFVRGEPHLMKNIHRRKPVHSHSLPNLQAO | 119                     |                                                                               |                  |                |              |        |     |
| Brassica                |                | KHNNFSSFIRQLNTYGFRKADPEQWEFANDDFVRGQPHLMKNIHRRKPVHSHSLPNLQO- | 119                     |                                                                               |                  |                |              |        |     |
| Vitis                   |                | KHNNFSSFIRQLNTYGFRKIDSEQWAFANEDFIRGQPHLLRNIHRRKPVHSHSIQNKQGO | 117                     |                                                                               |                  |                |              |        |     |
| Populus                 |                | KHNNFSSFIRQLNTYGFRKIDPEQWEFANEDFIRGQPHLMKNIHRRKPVHSHSMQNLQGO | 117                     |                                                                               |                  |                |              |        |     |
| Citrus                  |                | KHNNFSSFIRQLNTYGFRKVDPEQWEFANEDFVRGQPERLKNIHRRKPVHSHSNQNLHGO | 117                     |                                                                               |                  |                |              |        |     |
|                         |                |                                                              |                         | ***** * ** * : * : * : * : * : * : * : * : * : * : * : * : * : * : * : * :    |                  |                |              |        |     |
|                         |                |                                                              |                         |                                                                               |                  |                |              |        |     |
| <b>OD</b>               |                |                                                              |                         |                                                                               |                  |                |              |        |     |
| Arabidopsis             | LNP--          | LTDSERVRMNNQIERLTKEKEGLLEELHKODEEREVFEMOVKELKERLOHMEKRO      | 177                     |                                                                               |                  |                |              |        |     |
| Eutrema                 | QNP--          | LTDSERQRMNNQIERLTKEKEGLLEELHKQEEEREVFEEQVVKLLKQLOHMEKRO      | 177                     |                                                                               |                  |                |              |        |     |
| Brassica                | -HP--          | LTDSERQRMNDKIERLTKEKQVLLLEELHKHEEERELFEQVVKLLKQLOHHMEKRO     | 176                     |                                                                               |                  |                |              |        |     |
| Vitis                   | GTSCPLSESD     | REGYRADIERLKHDKGALLLELQKHEDRQGLELQMQHKLKDRLOHMEQRO           | 177                     |                                                                               |                  |                |              |        |     |
| Populus                 | GSN--          | LLTDSERQSMKDDIEKLRDKQALILELQKQEQERKGFEMQIEGLKEKLOQTECIQ      | 176                     |                                                                               |                  |                |              |        |     |
| Citrus                  | GTP--          | LTESERQGLKDDIERLKEKEIILLLELQRHQERQGFESQMQLLRERFQMECRO        | 175                     |                                                                               |                  |                |              |        |     |
|                         |                |                                                              |                         | * : * : * . . * : * : * : * : * : * : * : * : * : * : * : * : * : *           |                  |                |              |        |     |
|                         |                |                                                              |                         |                                                                               |                  |                |              |        |     |
| <b>Ser NLS Cys</b>      |                |                                                              |                         |                                                                               |                  |                |              |        |     |
| Arabidopsis             |                | KTMVSFVSVLEKPGALNLS                                          | S                       | PCVPETNERKRRFPRI                                                              | IEFFPDEPML-EENKT | C-VVVREE       | 235          |        |     |
| Eutrema                 |                | KTMVSFVSVLEKPGALNLS                                          | SPSLPETNERKRRFPRLGF     | ---EPML-EENQTC                                                                | -VVAREE          |                | 232          |        |     |
| Brassica                |                | RTMVSSVSVLEKPELALNLS                                         | PCLPEANERKRRFPVGL       | ---ETMLEENHQC                                                                 | -GAVREE          |                | 232          |        |     |
| Vitis                   |                | QTVISYLARMLQKPGALNLS                                         | PSM-ETHNRKRRLLTSNCFYDES | DVEENRIATSHTVNTE                                                              |                  |                | 236          |        |     |
| Populus                 |                | QTVISFVARVLPKPGALNIMPQ                                       | L-EGRDRKRLPRIGYLYSEAS   | NEDNQMVTSQALSRE                                                               |                  |                | 235          |        |     |
| Citrus                  |                | QKMVSFVGRALQKPGLESNFGAHL                                     | -ENHDRKRLPRIDYFYDEAN    | IEDNPMGTSQIVAG-                                                               |                  |                | 233          |        |     |
|                         |                |                                                              |                         | : : * : * * * . : * : * : * : * : * : * : * : * : * : * : * : * : * : * : * : |                  |                |              |        |     |
|                         |                |                                                              |                         |                                                                               |                  |                |              |        |     |
| <b>Thr,Ser AHA1 Cys</b> |                |                                                              |                         |                                                                               |                  |                |              |        |     |
| Arabidopsis             |                | GSTSPSSH-TREHQVEQLESS                                        | IAI                     | WENLVSDS                                                                      | CE               | SMLQ-S-RSMMLD  | VDESSTFPESP  | 292    |     |
| Eutrema                 |                | GSTSPSSH-TTEHQVEQLESS                                        | IAI                     | WENLVSE                                                                       | CS               | MAQ-STRSMMLD   | VDESSTCPESP  | 290    |     |
| Brassica                |                | GSTSTSSHDATEHQVERLESS                                        | IAI                     | WENLVSD                                                                       | CS               | MEQETRNMMLD    | VDESSTCPESP  | 292    |     |
| Vitis                   |                | KLDATS----                                                   | VLELVEF                 | LESSLSSWEDILDDLSSNCSR                                                         | ---              | DVNSSVELDES    | MSCAESPG     | 289    |     |
| Populus                 |                | NADSNVALLNMEQFEQLESS                                         | LTF                     | WENMVHDIGQTYNY                                                                | ---              | NNSTIEMDD      | STSGAQSPA    | 291    |     |
| Citrus                  |                | -ADSADISSNMEKFEQLESS                                         | MTF                     | WENIVQDVGQSCFQ                                                                | ---              | PNSSELEDEST    | SCADSPA      | 288    |     |
|                         |                |                                                              |                         | : . . * * * : * : * : * : * : * : * : * : * : * : * : * : * :                 |                  |                |              |        |     |
|                         |                |                                                              |                         |                                                                               |                  |                |              |        |     |
| <b>Cys Ser AHA2</b>     |                |                                                              |                         |                                                                               |                  |                |              |        |     |
| Arabidopsis             |                | LSCIQLSVDSRLKSP                                              | SPRI                    | IDMNCEPDGSKEQN                                                                | -----            | TVAAPPPP       | VAGANDGFWQ   | 346    |     |
| Eutrema                 |                | LSCIQLSIDTRPKCPP                                             | SPRI                    | IDMNSEPDVSKEQS                                                                | -----            | TVAPAPPP       | PAAGVNDVFWQ  | 344    |     |
| Brassica                |                | LSCIQLSIDIRLKSPP                                             | SPRT                    | IDMNSEPDVSKEQN                                                                | -----            | TVSP--         | TPAVGANDVFWQ | 344    |     |
| Vitis                   |                | ISYIQLNIDTRSKST                                              | ---                     | GIDMNCKPAAT                                                                   | -APEV            | TTLKEQVGAAS    | PVPTGVNDVFWQ | 344    |     |
| Populus                 |                | ISCVHLNVDFRPKSP                                              | ---                     | GIDMNSEPSAAVAPE                                                               | PEP              | VSPKEQLAGTAPT  | VTATGVNDVFWQ | 347    |     |
| Citrus                  |                | ISCIQLNVDARPKSP                                              | ---                     | GIDMNSEPAVTAATEP                                                              | VPS              | KEPETATTIPLQAG | VNDVFWQ      | 344    |     |
|                         |                |                                                              |                         | * : * : * : * * . **** : * : . . . * * * * * :                                |                  |                |              |        |     |
|                         |                |                                                              |                         |                                                                               |                  |                |              |        |     |
| <b>NES Thr</b>          |                |                                                              |                         |                                                                               |                  |                |              |        |     |
| Arabidopsis             |                | FFSENPGSTEQREVQLERKDDK                                       | KAGV----                | RTEKCW                                                                        | WNSRNVNA         | ITEQLGHL       | TSERS        | 401    |     |
| Eutrema                 |                | FLTENPGSAEQREVQLERKDDK                                       | --AED----               | RSEKCW                                                                        | WNSRNVNT         | ITEQLEHL       | TS----       | 393    |     |
| Brassica                |                | LLTENPGSTEQREVQSEK                                           | -----                   | AEE----                                                                       | RSEKYW           | WNSRNVNT       | ITEQLGHL     | TS---- | 389 |
| Vitis                   |                | FFTENPDSS-AEEVQLERKDD                                        | DESRKNEGKHGDHGR         | FVW                                                                           | NARSANKLAD       | QMGQLTPAERT    |              | 402    |     |
| Populus                 |                | FLTENPGSTNAQEVQSERK                                          | SDGRKGEIKPVD            | PGKFW                                                                         | WNRVNNL          | TEQMGHLTPAERT  |              | 406    |     |
| Citrus                  |                | FLTENPGSSDAQEVQSERKE                                         | CDGKKNENKPADHGK         | FVW                                                                           | NRVNSLAE         | QMGHLTPAERT    |              | 403    |     |
|                         |                |                                                              |                         | : : * * * * * : . * * * * : : * * * * . * : * : * * * * :                     |                  |                |              |        |     |

**DBD** DNA binding domain, **OD** HR-A/HR-B oligomerization domain, **NLS**, **NES** nuclear localization, **AHA** activator motifs, (Nover et al., 2001),

**C** Cys residues conserved in Brassicaceae, **S,T** phosphorylated Ser or Thr residues (MS data).

**Figure S2. Multiple sequence alignment of six HSFA4A protein sequences.** CLUSTAL O(1.2.0) multiple sequence alignment was made with the following sequences: *Arabidopsis thaliana* (AEE84101), *Eutrema salsugineum* (*Thellungiella salsuginea*, ESQ55497), *Brassica napus* (ADX69244), *Vitis vinifera* (XP\_002267171), *Populus trichocarpa* (EEE97421), *Citrus sinensis* (XP\_006467594). Domain structure of the Arabidopsis HSFA4A is indicated according to Nover et al., (2001) Cell Stress Chaperones 6: 177-189.

## A Transcriptional activation of HSFA4A in wild type plants

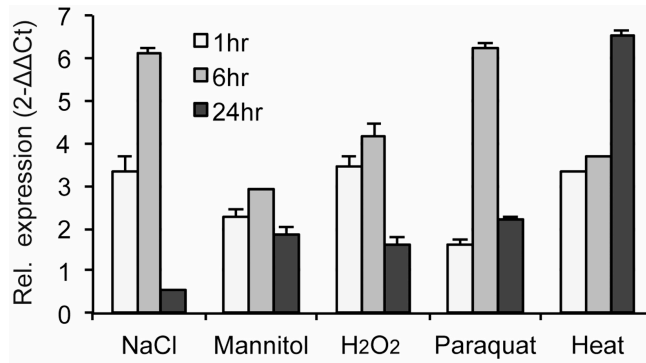

## B Gene expression in H<sub>2</sub>O<sub>2</sub>-treated Col-0 plants

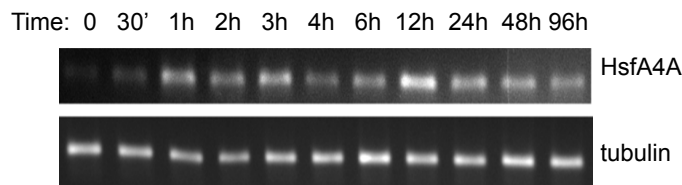

## Gene expression in estradiol-treated HSFA4ox2 plants

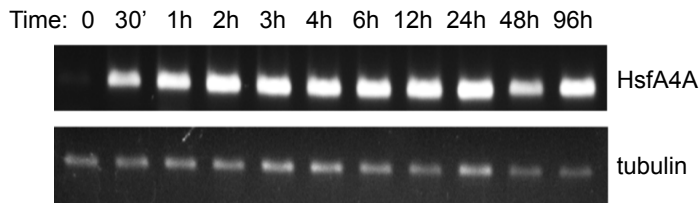

**Figure S3. Regulation of HSFA4A transcription.** A) Transcriptional activation of *HSFA4A* by salt (150 mM NaCl), osmotic (300 mM mannitol), oxidative (1 mM H<sub>2</sub>O<sub>2</sub>, 1  $\mu$ M paraquat) and heat (37°C) stress in wild type plants. One relative unit corresponds to the transcript level of non-treated plants at the first time points of measurements. Bars indicate standard deviation. B) Induction of the *HSFA4A* gene in wild-type plants by 1 mM H<sub>2</sub>O<sub>2</sub>. C) Induction of *HSFA4A* in transgenic *Arabidopsis* plants (HSF4ox2 line) by 5  $\mu$ M estradiol. Reference gene:  $\beta$ -tubulin (*AT5G62690*)

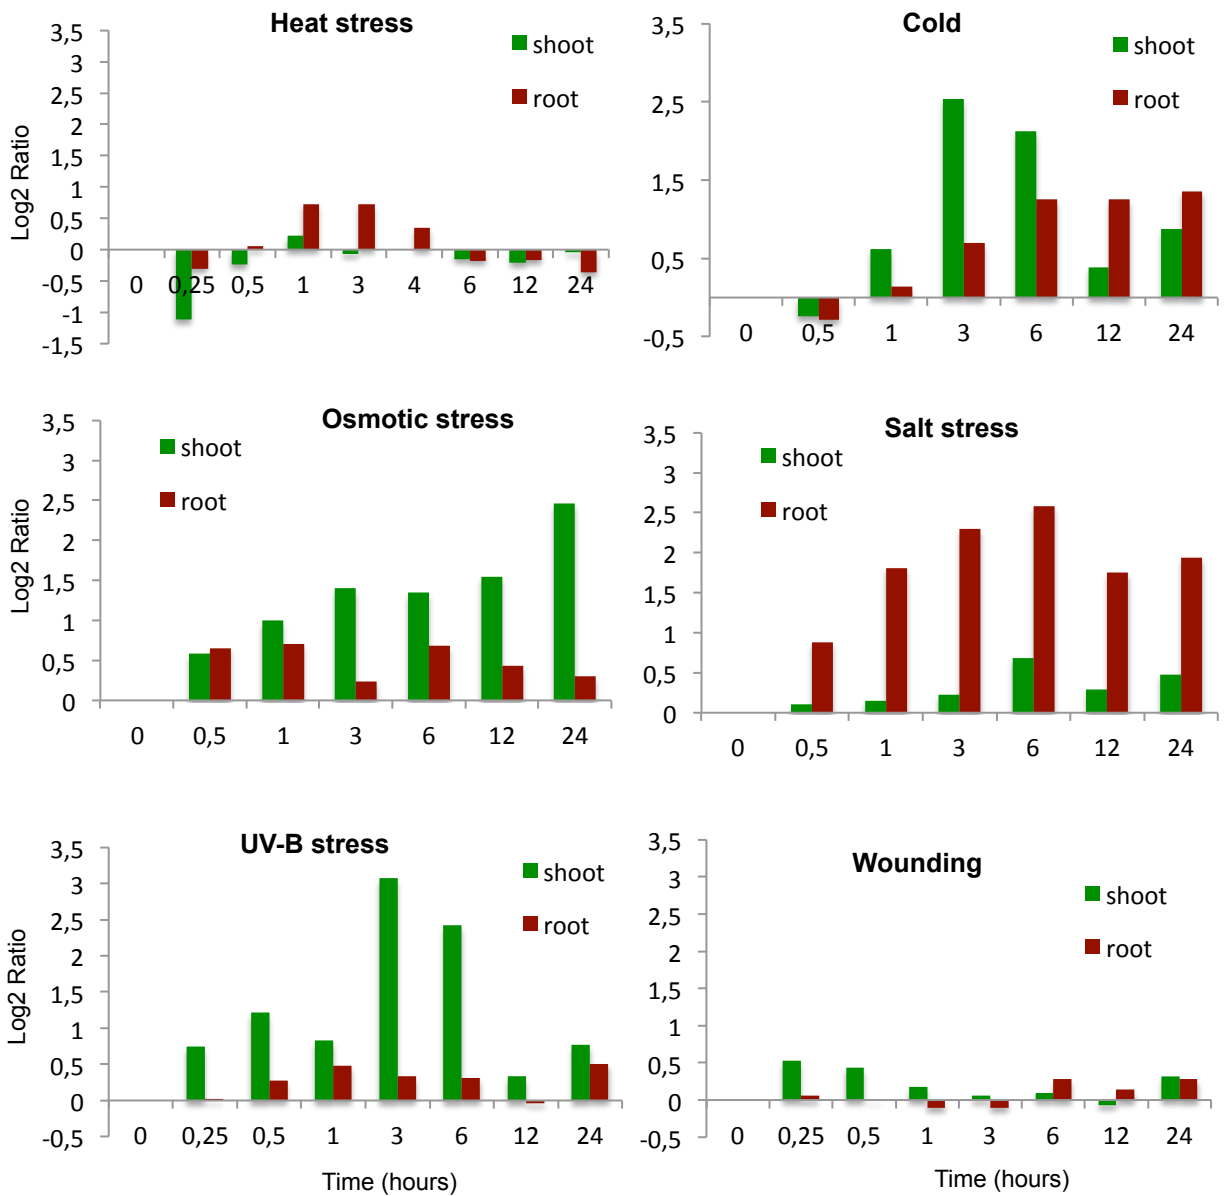

**Figure S4. Transcriptional activation of HSFA4A gene in different abiotic stress conditions.** Data were extracted from from public transcript database eFP Browser ([http://bar.utoronto.ca/efp\\_arabidopsis](http://bar.utoronto.ca/efp_arabidopsis)). Numerical data were processed and diagrams were prepared with Microsoft Excel.

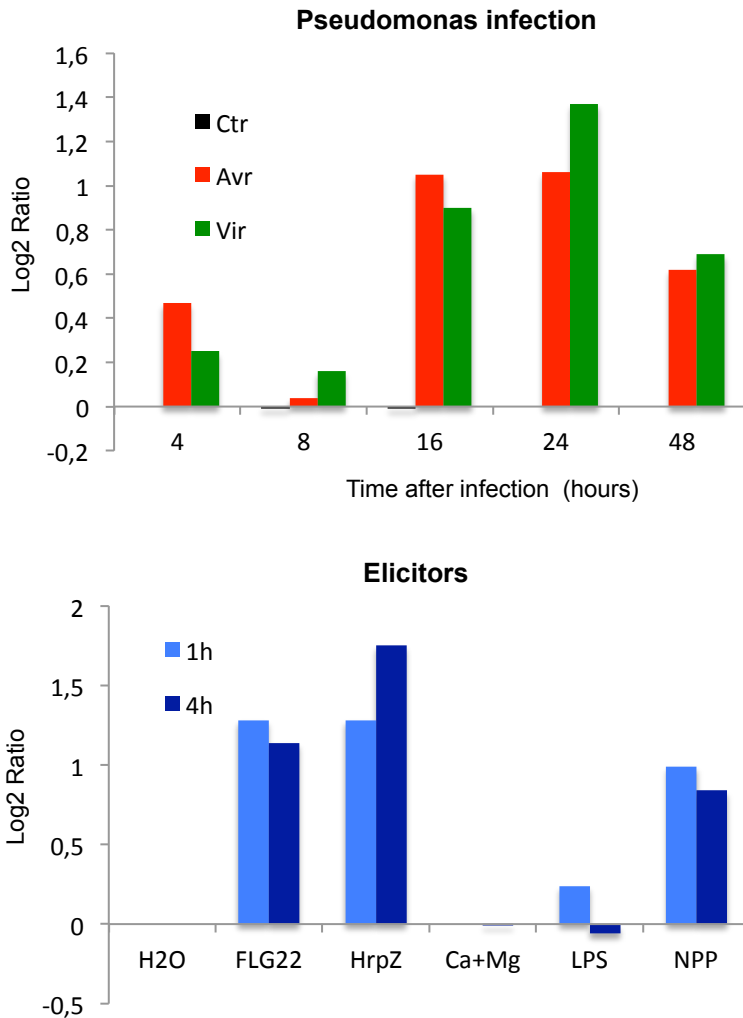

**Figure S5. Transcriptional activation of HSFA4A gene by biotic stress.** Effect of bacterial infection (*Pseudomonas*) and by bacterial (FLG22, HrpZ) and fungal (NPP) effectors on HSFA4A expression. Data were extracted from from public transcript database eFP Browser ([http://bar.utoronto.ca/efp\\_arabidopsis](http://bar.utoronto.ca/efp_arabidopsis)). Numerical data were processed and diagrams were prepared with Microsoft Excel.

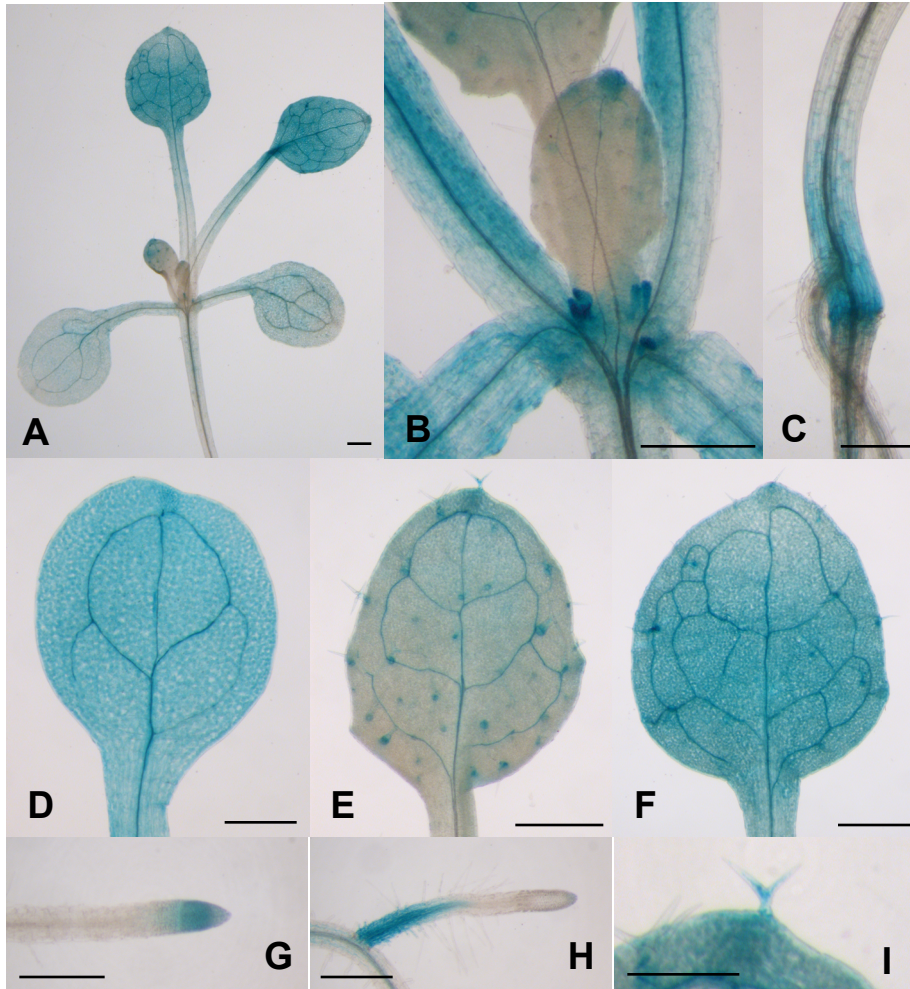

**Figure S6. Spatial expression of pHSFA4A-GUS in transgenic plants.** GUS activity was monitored by histochemical staining in 12 days-old *Arabidopsis* plants and are shown in whole seedlings (A), the shoot tip region (B), hypocotyl and root junction (C), cotyledons (D), young leaves (E), mature leaves (F), root tips (G), lateral roots (H) and trichomes (I). Bars indicate 0.5mm.

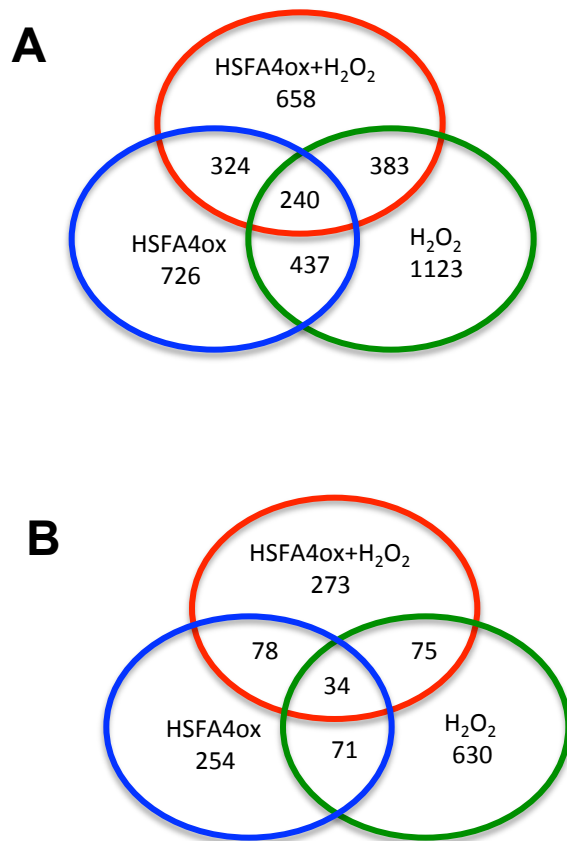

**Figure S7. HSFA4A regulates the expression of a large set of genes.** RNA-Seq transcript profiling was performed to identify possible transcriptional targets of HSFA4A in relation to oxidative stress. Col-0 and HSFA4Aox2 plants were treated with 5  $\mu$ M estradiol in the absence or presence of 1 mM H<sub>2</sub>O<sub>2</sub>. Venn diagrams depicting the distribution of Arabidopsis genes that upregulated (**A**) or downregulated (**B**) at least two times compared to Col-0. **H<sub>2</sub>O<sub>2</sub>**: Col-0+H<sub>2</sub>O<sub>2</sub> vs Col-0; **HSFA4ox**: HSFA4ox2 vs Col-0 and **HSFA4ox+H<sub>2</sub>O<sub>2</sub>**: HSFA4ox2+ H<sub>2</sub>O<sub>2</sub> vs Col-0.



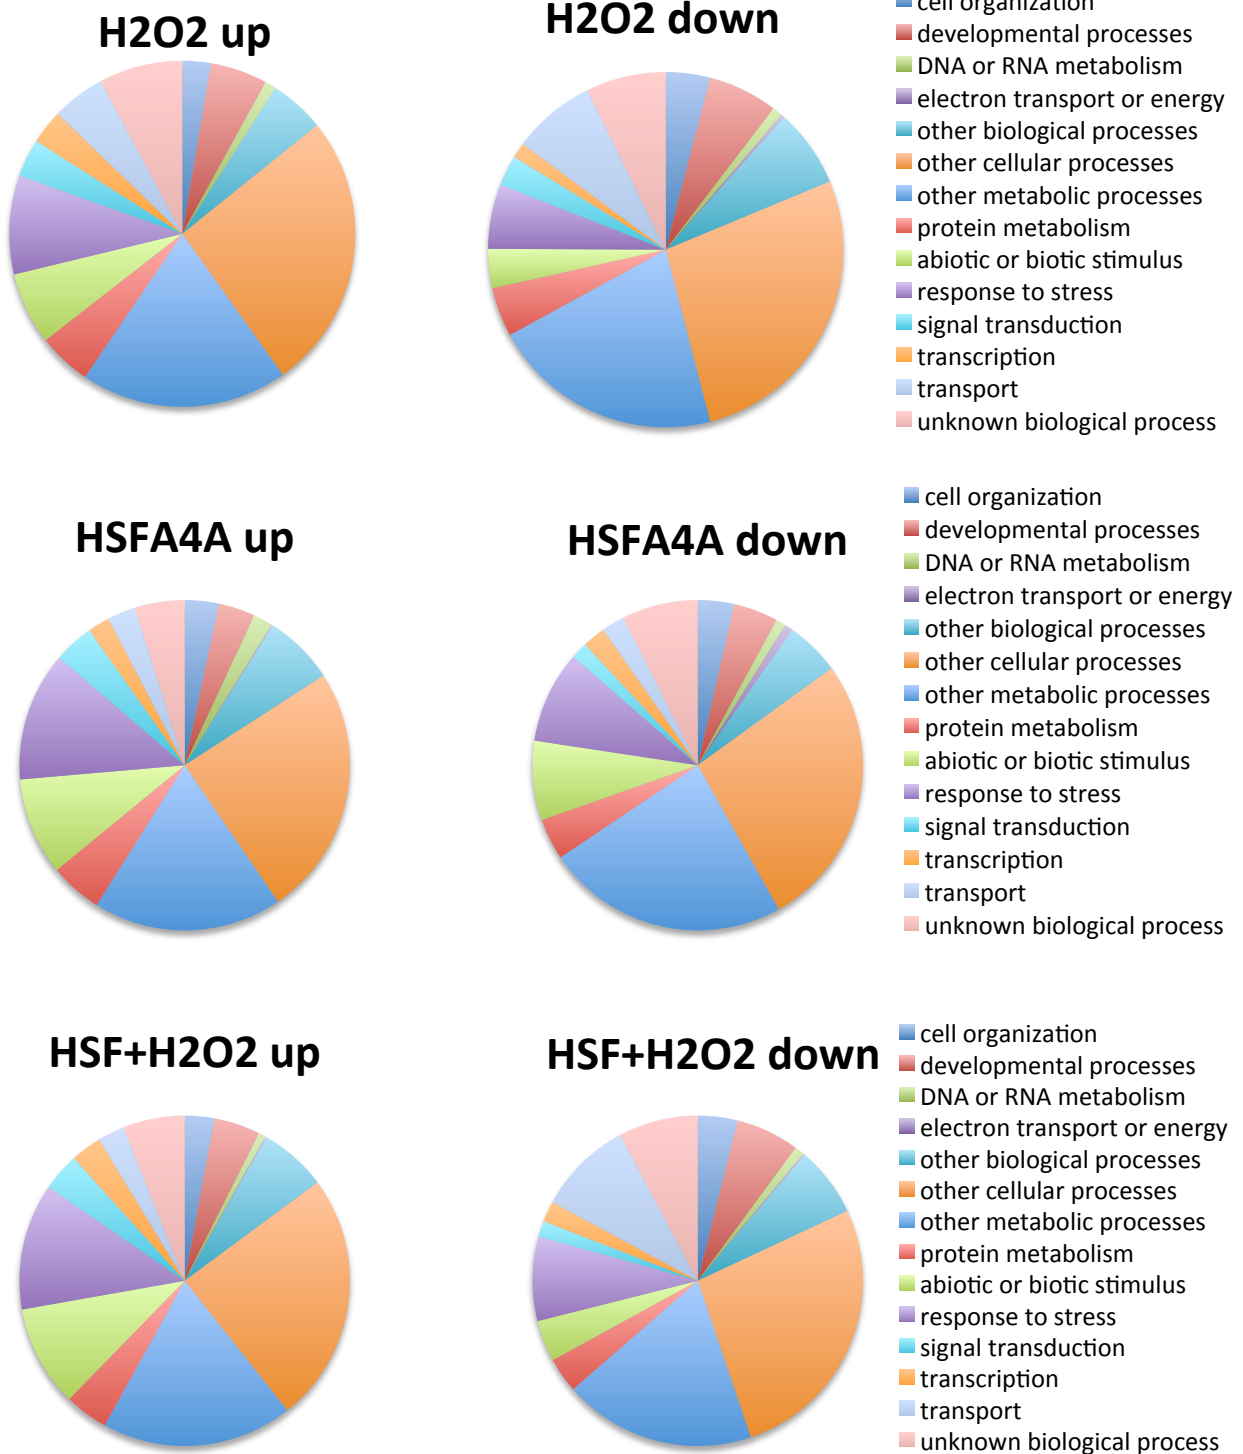

**Figure S8A. Gene Ontology categorization** (Biological Process) of gene sets which were up or downregulated by hydrogen peroxide in Col-0 plants (H2O2 up and H2O2 down) or in HSFA4Aox2 versus Col-0 plants (HSFA4A up and HSFA4A down, respectively) or by hydrogen peroxide in HSFA4Aox2 plants (HSF+H2O2 up and HSF+H2O2 down, respectively). Data were obtained from RNAseq transcript profiling experiment, GO categories were set up by Bulk Retrieval function of the TAIR web site ([www.arabidopsis.org](http://www.arabidopsis.org)) and processed with MS Excel. Note, that genes involved in abiotic or biotic stimulus and response to stress are more frequent in categories induced by hydrogen peroxide, HSFA4A overexpression or by hydrogen peroxide in HSFA4Aox plants versus those downregulated by these conditions.



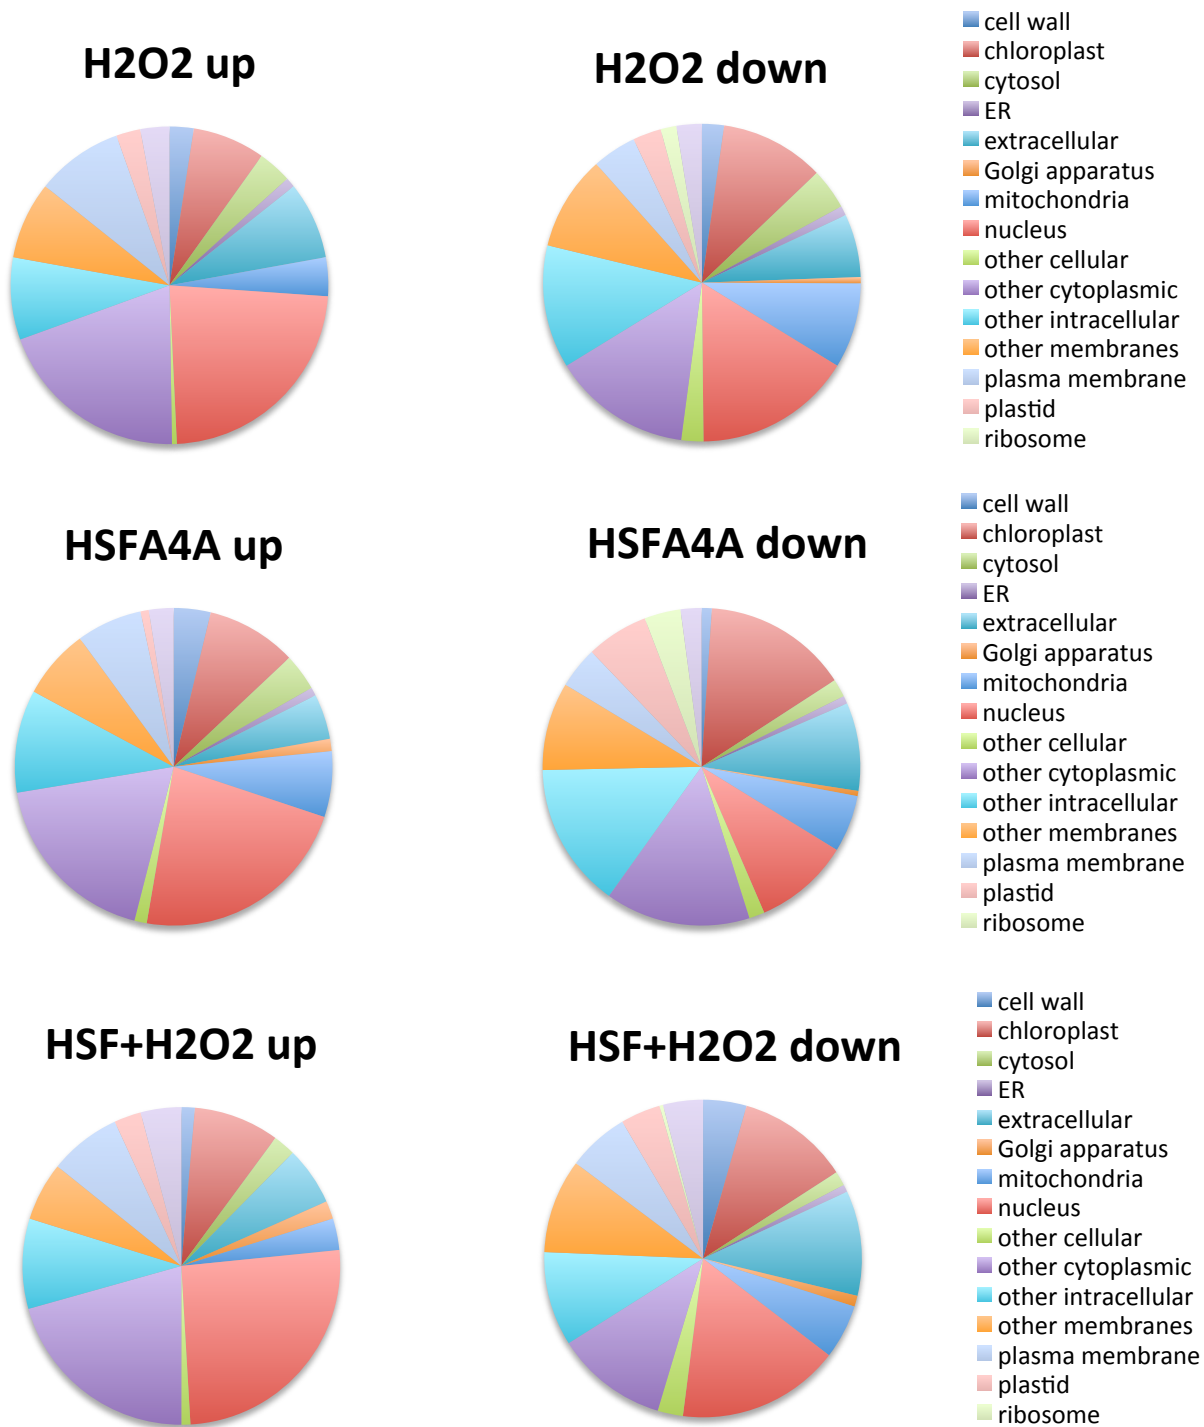

**Figure S8B.** Gene Ontology categorization (Cellular Component) of gene sets which were up or downregulated by hydrogen peroxide in Col-0 plants (H2O2 up and H2O2 down) or in HSFA4Aox2 versus Col-0 plants (HSFA4A up and HSFA4A down, respectively) or by hydrogen peroxide in HSFA4Aox2 plants (HSF+H2O2 up and HSF+H2O2 down, respectively). Data were obtained from RNAseq transcript profiling experiment, GO categories were set up by Bulk Retrieval function of the TAIR web site ([www.arabidopsis.org](http://www.arabidopsis.org)) and processed with MS Excel. Note, that the category of nuclear localization is larger among genes upregulated by HSFA4Aox when compared to downregulated genes.

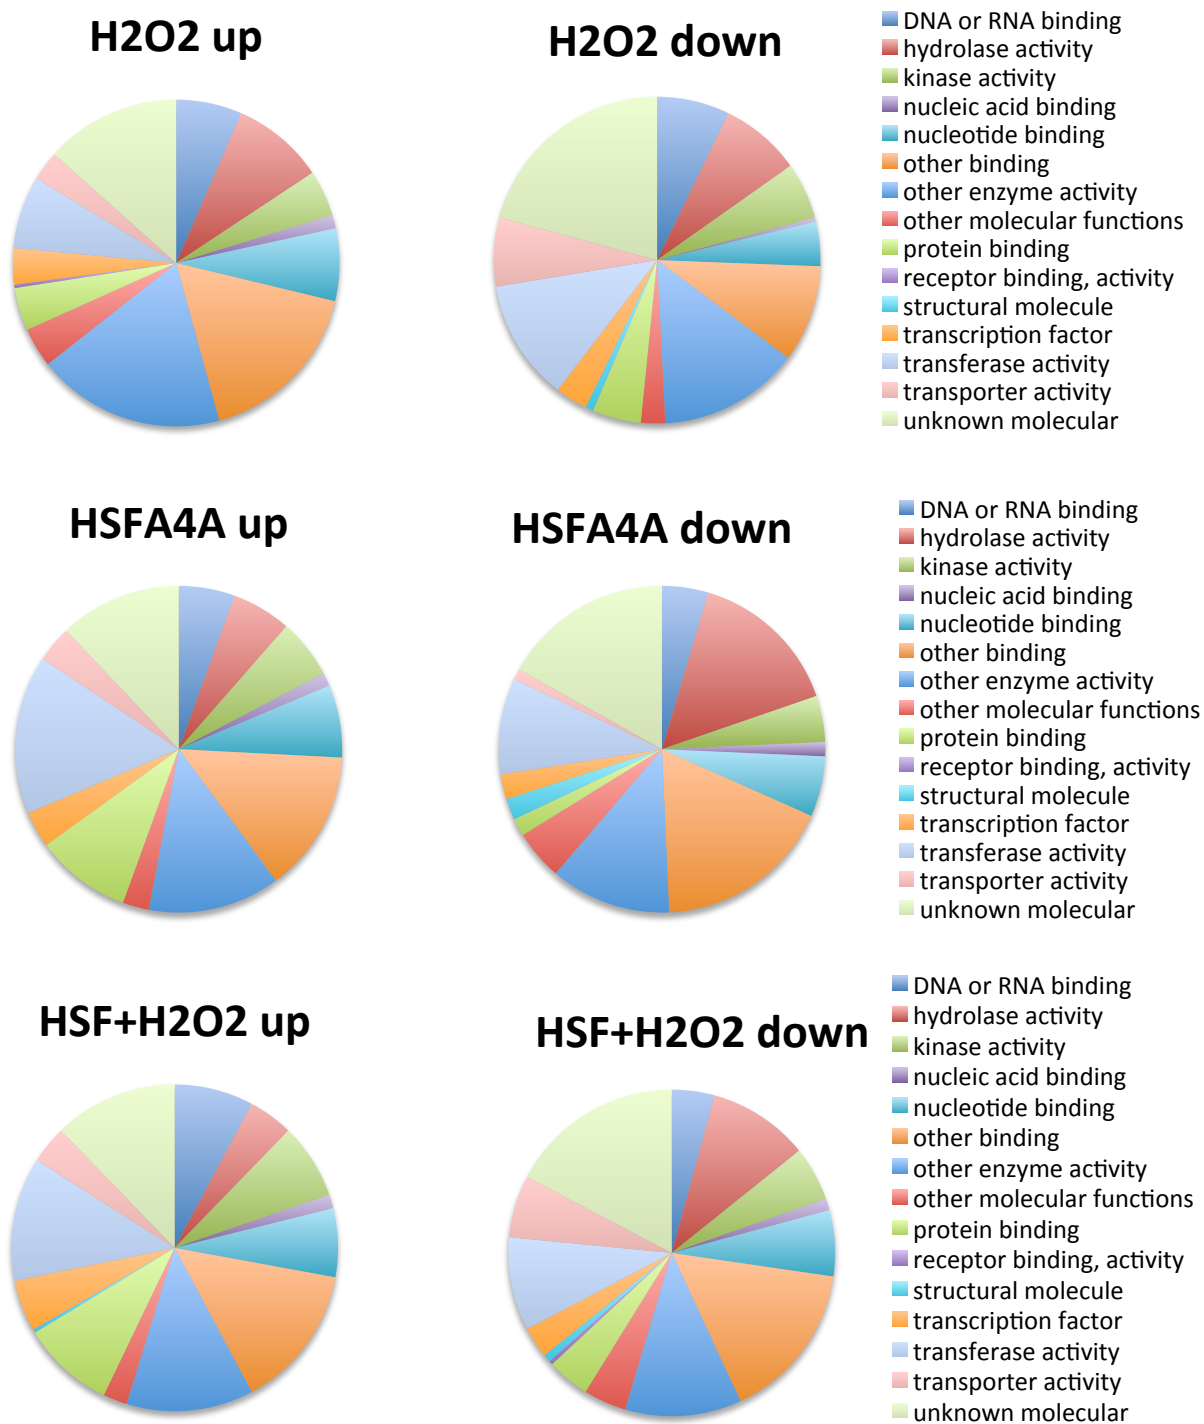

**Figure S8C.** Gene Ontology categorization (Molecular Function) of gene sets which were up or downregulated by hydrogen peroxide in Col-0 plants (H2O2 up and H2O2 down) or in HSFA4Aox2 versus Col-0 plants (HSFA4A up and HSFA4A down, respectively) or by hydrogen peroxide in HSFA4Aox2 plants (HSF+H2O2 up and HSF+H2O2 down, respectively). Data were obtained from RNAseq transcript profiling experiment, GO categories were set up by Bulk Retrieval function of the TAIR web site ([www.arabidopsis.org](http://www.arabidopsis.org)) and processed with MS Excel. Note, that the category protein binding is larger among genes upregulated by HSFA4Aox, while the category DNA or RNA binding is larger among genes upregulated by HSFA4Aox with H2O2 treatment versus downregulated ones in these conditions.

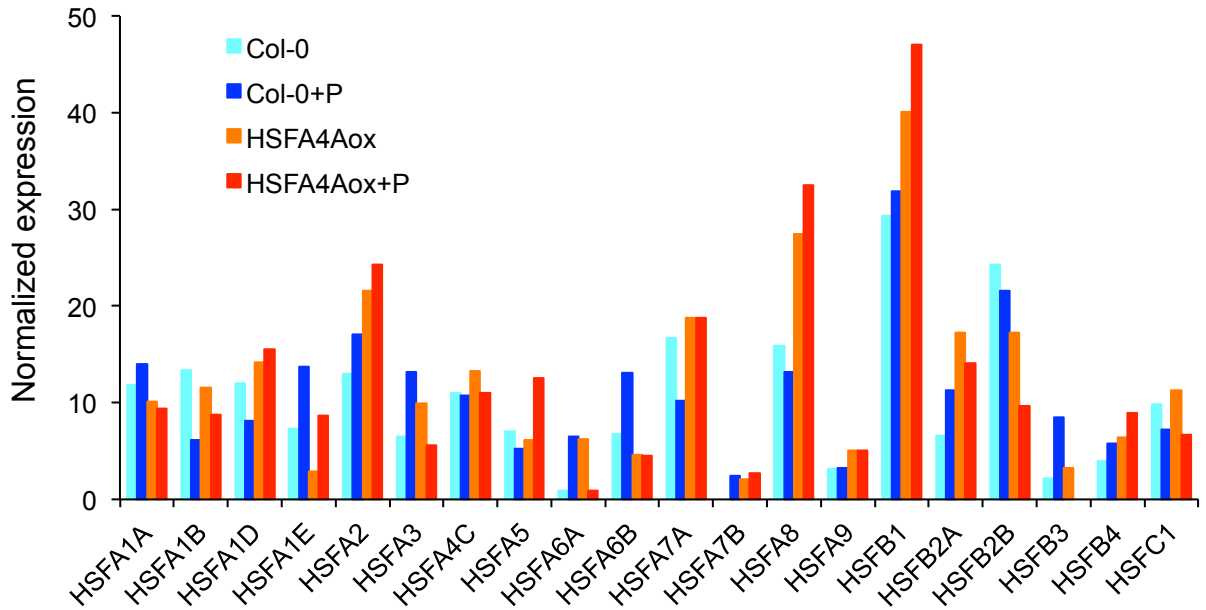

**Figure S9. Expression profiles of Arabidopsis heat shock factors in wild type and HSFA4A overexpressing plants.** Expression data from transcript profiling experiment were assembled. Samples: Col-0 (untreated wild type), Col-0+P (hydrogen peroxide-treated wild type), HSFA4Aox (untreated HSFA4A overexpressing), HSFA4Aox+P (hydrogen peroxide-treated HSFA4A overexpressing), all samples were treated with estradiol.

## Supplemental Tables

**Table S1.** Summary of results of cell suspension transformation with the COS library.

| Experiment | No. of colonies | Selected microcalli | Calli with sustained growth |
|------------|-----------------|---------------------|-----------------------------|
| 1          | 500000          | 93                  | 2                           |
| 2          | 540000          | 119                 | 2                           |
| 3          | 190000          | 79                  | 0                           |
| <b>all</b> | <b>1230000</b>  | <b>291</b>          | <b>4</b>                    |

**Table S2.** Arabidopsis cDNAs identified in COS-transformed cell cultures showing enhanced growth on high salt medium.

| Callus no. | Fragment size | AGI              | Encoded protein                     | Inserted cDNA |
|------------|---------------|------------------|-------------------------------------|---------------|
| 1.1        | 1,9kb         | <i>AT4G18880</i> | Heat shock transcription factor A4A | Full length   |
| 1.2        | 1,4kb         | <i>AT3G44300</i> | Nitrilase 2                         | Full length   |
| 7.1        | 0,8kb         | <i>AT5G48810</i> | Cytocrome b5 B                      | Full length   |
| 7.2        | 1,0kb         | <i>AT1G44900</i> | Minichromosome maintenance 2        | Truncated     |
| 9          | 0,5kb         | <i>AT3G48580</i> | Xyloglucan endotransglucosylase 11  | Truncated     |
| 14         | 0,8kb         | <i>AT2G30860</i> | Glutathione S-transferase 9         | Full length   |

**Table S3.** Genes upregulated by both HSFA4A overexpression and H<sub>2</sub>O<sub>2</sub> treatment.

| AGI       | Protein                                       | HSFA4A |                               |                                |     | Other TF                                         |
|-----------|-----------------------------------------------|--------|-------------------------------|--------------------------------|-----|--------------------------------------------------|
|           |                                               | HSFA4A | H <sub>2</sub> O <sub>2</sub> | +H <sub>2</sub> O <sub>2</sub> | HSE |                                                  |
| AT5G12030 | small heat shock protein HSP17.6A             | 7,3    | 16,1                          | 22,3                           | 0   | AP2/EREBP, MYB, C2C2(Zn) Dof                     |
| AT5G12020 | small heat shock protein HSP17.6II            | 5,3    | 4,5                           | 18,3                           | 1   | AP2/EREBP                                        |
| AT1G64500 | glutaredoxin-like protein                     | 2,9    | 4,6                           | 15,3                           | 1   | HD-HOX                                           |
| AT3G46230 | small heat shock protein HSP17.4              | 4,7    | 3,3                           | 14,5                           | 1   | HSFB, C2C2(Zn) Dof                               |
| AT1G53540 | HSP20-like chaperone protein                  | 5,6    | 5,2                           | 12,4                           | 2   | HSFB, HD-HOX                                     |
| AT4G22960 | Protein of unknown function (DUF544)          | 6,6    | 13,8                          | 12,4                           | 1   | C2C2(Zn) Dof                                     |
| AT1G17010 | 2-oxoglutarate and Fe(II)-dependent oxygenase | 7,3    | 4,3                           | 12,3                           | 0   |                                                  |
| AT1G69570 | Dof-type zinc finger DNA-binding protein      | 3,2    | 4,3                           | 11,1                           | 1   | bZIP, MYB, GATA                                  |
| AT1G16030 | heat shock protein HSP70B                     | 2,9    | 7,5                           | 8,6                            | 0   | HSFB                                             |
| AT4G25200 | small heat shock protein, HSP23.6-MITO        | 11,3   | 1,4                           | 8,2                            | 1   | MYB                                              |
| AT1G06160 | ethylene response factor, ERF094, ORA59       | 2,7    | 2,1                           | 6,9                            | 1   | AP2/EREBP, MYB, SBP,                             |
| AT5G27420 | E3 ubiquitin-protein ligase, ATL31, CNI1,     | 5,1    | 4,2                           | 6,8                            | 1   | bZIP, Trihelix, HD-HOX, C2C2(Zn) Dof             |
| AT2G30770 | Cytochrome P450 protein, CYP71A13             | 5,1    | 6,0                           | 5,7                            | 0   | HD-HOX, TBP                                      |
| AT3G15450 | Aluminium induced, YGL and LRDR protein       | 2,3    | 1,8                           | 5,7                            | 0   | Trihelix, MYB                                    |
| AT3G28210 | stress-associated protein 12, SAP12, PMZ      | 3,0    | 1,7                           | 5,3                            | 0   | HSFB                                             |
| AT1G71000 | Chaperone DnaJ-domain protein;                | 3,5    | 2,6                           | 4,8                            | 1   | AP2/EREBP, MYB, HD-HOX,                          |
| AT5G52640 | heat shock protein, HSP90.1                   | 5,1    | 1,5                           | 4,3                            | 2   | AP2/EREBP, MYB, HD-HOX,                          |
| AT5G44310 | Late embryogenesis abundant (LEA) protein     | 2,2    | 5,2                           | 4,3                            | 1   | HSFB, Dof                                        |
| AT2G29500 | HSP20-like chaperone protein                  | 2,0    | 2,1                           | 4,1                            | 1   | HD-HOX                                           |
| AT4G23210 | cysteine-rich receptor kinase 13, CRK13       | 2,3    | 2,2                           | 3,9                            | 0   | AP2/EREBP, MYB                                   |
| AT2G04040 | MATE family transporter related protein TX1   | 2,3    | 2,3                           | 3,7                            | 1   | HD-HOX, C2C2(Zn) Dof                             |
| AT1G32460 | unknown protein                               | 3,3    | 3,0                           | 3,5                            | 1   |                                                  |
| AT1G74310 | heat shock protein HSP101                     | 2,4    | 2,1                           | 3,4                            | 1   | bZIP, AP2/EREBP, HD-HOX                          |
| AT1G27730 | salt tolerance zinc finger, STZ/ZAT10         | 1,7    | 3,0                           | 3,2                            | 0   | HSFB, AP2/EREBP, MYB, HD-HOX                     |
| AT5G41750 | Disease resistance protein (TIR-NBS-LRR)      | 1,6    | 1,4                           | 3,0                            | 2   | MYB, HD-HOX, C2C2(Zn) Dof, CBF                   |
| AT5G48570 | peptidylprolyl isomerase ROF2                 | 3,0    | 1,9                           | 2,8                            | 1   | MYB, HD-HOX, C2C2(Zn) Dof                        |
| AT5G25930 | LRR-type protein kinase                       | 2,4    | 1,4                           | 2,8                            | 0   | MYB                                              |
| AT1G29060 | Target SNARE coiled-coil domain protein;      | 2,0    | 2,3                           | 2,8                            | 0   | bZIP, MYB, HD-HOX                                |
| AT4G21400 | cysteine-rich receptor kinase 28, CRK28       | 1,9    | 2,2                           | 2,7                            | 0   | HSFB, MYB, HD-HOX                                |
| AT1G22510 | unknown RING/U-box protein (DUF 1232)         | 2,7    | 3,1                           | 2,7                            | 0   | bZIP, MYB                                        |
| AT3G17611 | rhomboid-like protein 14, RBL14               | 2,1    | 2,2                           | 2,6                            | 0   | AP2/EREBP, Trihelix, MYB, TCP                    |
| AT5G46350 | WRKY transcription factor 8, WRKY8            | 2,6    | 2,8                           | 2,6                            | 2   | HSFB, Trihelix,<br>HSFB, AP2/EREBP, SBP, HD-HOX, |
| AT2G27490 | dephospho-CoA kinase, ATCOAE                  | 1,9    | 1,8                           | 2,6                            | 1   | C2C2(Zn) Dof                                     |
| AT1G72920 | Toll-Interleukin-Resistance (TIR) protein     | 3,7    | 2,3                           | 2,5                            | 0   | Trihelix, HD-HOX, C2C2(Zn) Dof                   |
| AT5G04340 | C2H2 zinc finger transcription factor, ZAT6   | 2,5    | 2,1                           | 2,5                            | 1   | AP2/EREBP, Trihelix, MYB                         |
| AT1G08315 | ARM repeat superfamily protein;               | 2,8    | 2,2                           | 2,5                            | 1   |                                                  |
| AT2G47180 | galactinol synthase 1, GalS1                  | 2,5    | 2,0                           | 2,5                            | 1   | AP2/EREBP, MYB, HD-HOX                           |
| AT3G43230 | RING/FYVE/PHD-type zinc finger protein;       | 2,2    | 2,0                           | 2,4                            | 0   | HSFB, AP2/EREBP                                  |
| AT1G33030 | O-methyltransferase family protein;           | 2,6    | 4,4                           | 2,4                            | 0   | HSFB, AP2/EREBP, HD-HOX                          |
| AT5G52760 | Copper transport protein family;              | 2,8    | 6,9                           | 2,4                            | 1   |                                                  |
| AT2G31990 | Exostosin family protein;                     | 2,8    | 2,2                           | 2,3                            | 1   | MYB, HD-HOX                                      |
| AT5G61270 | phytochrome-interacting factor 7, PIF7        | 1,6    | 1,9                           | 2,3                            | 0   | MYB                                              |
| AT1G26420 | FAD-binding Berberine family protein;         | 2,6    | 2,0                           | 2,3                            | 1   | AP2/EREBP, MYB                                   |

|           |                                             |     |     |     |   |                                                                 |
|-----------|---------------------------------------------|-----|-----|-----|---|-----------------------------------------------------------------|
| AT1G02560 | ATP-dependent Clp protease, CLPP5           | 3,0 | 3,4 | 2,1 | 0 | bZIP, HD-KNOTTED, Trihelix<br>HSFB, C2H2(Zn), Trihelix, HD-HOX, |
| AT2G29990 | alternative NAD(P)H dehydrogenase 2, NDA2   | 1,8 | 2,1 | 2,1 | 2 | CBF, HD-ZIP                                                     |
| AT1G68570 | Major facilitator superfamily protein;      | 2,2 | 2,1 | 2,1 | 1 | MADS, MYB,                                                      |
| AT2G43580 | Chitinase family protein;                   | 3,2 | 6,0 | 2,1 | 1 |                                                                 |
| AT1G60730 | NAD(P)-linked oxidoreductase protein;       | 2,4 | 2,0 | 2,0 | 1 | HD-HOX                                                          |
| AT4G18250 | putative receptor serine/threonine kinase   | 2,8 | 1,9 | 1,9 | 0 | Trihelix, HD-HOX                                                |
| AT4G28020 | unknown protein;                            | 2,6 | 1,9 | 1,9 | 0 | AP2/EREBP, MYB, HD-HOX                                          |
| AT3G03440 | ARM repeat protein                          | 2,6 | 1,9 | 1,9 | 0 | MYB                                                             |
| AT2G41640 | Glycosyltransferase family 61 protein       | 2,6 | 1,9 | 1,9 | 1 | MYB, HD-HOX                                                     |
| AT5G17370 | Transducin/WD40 repeat-like protein         | 2,8 | 1,9 | 1,9 | 0 | HD-HOX                                                          |
| AT4G25390 | putative protein kinase protein             | 2,1 | 3,9 | 1,8 | 0 | MYB                                                             |
| AT2G14290 | Protein of unknown function DUF295          | 2,4 | 4,7 | 1,8 | 0 | MYB, ABI3/VP1                                                   |
| AT5G59820 | C2H2-type zinc finger protein, ZAT12, RHL41 | 1,3 | 1,4 | 1,5 | 2 | MYB                                                             |
| AT5G24110 | WRKY transcription factor 30, WRKY30        | 3,4 | 3,7 | 0,5 | 2 | ABI3/VP1, HD-HOX, MADS                                          |

List of genes found commonly upregulated by HSFA4A overexpression and H<sub>2</sub>O<sub>2</sub> treatment. RNA-Seq was performed with RNA from two weeks old Col-0 and HSFA4A-ox2 plants after plus /minus 1mM H<sub>2</sub>O<sub>2</sub> treatment. Plants for every sample were equally treated with 5 µM estradiol. Values indicate differential gene expression (fold change) relative to Col-0 minus H<sub>2</sub>O<sub>2</sub> sample. Categories presented in columns: **AGI**: AGI number of genes. **Protein**: type of encoded protein, **HSFA4A**: fold change in HSFA4Aox2 minus H<sub>2</sub>O<sub>2</sub> vs. Col-0 minus H<sub>2</sub>O<sub>2</sub> samples. **H<sub>2</sub>O<sub>2</sub>**: fold change in Col-0 plus H<sub>2</sub>O<sub>2</sub> vs. Col-0 minus H<sub>2</sub>O<sub>2</sub> samples, **HSFA4A+H<sub>2</sub>O<sub>2</sub>**: fold change in HSFA4Aox2 plus H<sub>2</sub>O<sub>2</sub> vs. Col-0 minus H<sub>2</sub>O<sub>2</sub> samples, **HSE**: number of Heat Shock Elements identified in the 1000bp promoter regions determined with Promomer (bar.utoronto.ca). **Other TF** category indicate other predicted TF binding sites (AthaMap promoter search tool, [www.athamap.de](http://www.athamap.de), 75% restriction).

According to Genevestigator ([www.genevestigator.com](http://www.genevestigator.com)) analysis of public transcript profiling data 80% of these genes are induced by several abiotic stresses (heat, ozone, UV light, hypoxia, osmotic and salt stress, H<sub>2</sub>O<sub>2</sub>), several pathogens (*P. syringe*, *B. graminis*), effectors (FLG22, HrpZ), in *cat2* and *flu* mutants, down-regulated during germination and by MeJA.

**Table S4.** Genes downregulated by both HSFA4A overexpression and H<sub>2</sub>O<sub>2</sub> treatment.

| AGI       | Protein                                                | HSFA4A |                               |                                |     | Other TF                     |
|-----------|--------------------------------------------------------|--------|-------------------------------|--------------------------------|-----|------------------------------|
|           |                                                        | HSFA4A | H <sub>2</sub> O <sub>2</sub> | +H <sub>2</sub> O <sub>2</sub> | HSE |                              |
| AT1G05250 | peroxidase 1/2                                         | -1,4   | -4,3                          | -12,9                          | 0   | AP2/EREBP                    |
| AT4G30500 | Protein of unknown function (DUF788);                  | -8,3   | -5,3                          | -11,1                          | 1   | HD-HOX, MYB                  |
| AT4G02270 | protein root hair specific 13, RHS13                   | -3,8   | -4,0                          | -5,9                           | 0   | bZIP, MYB                    |
| AT2G13100 | starvation-induced glycerol-3-phosphate permease       | -5,1   | -9,6                          | -5,2                           | 0   | MYB, HD-HOX                  |
| AT2G35810 | unknown protein;                                       | -2,7   | -2,8                          | -5,1                           | 0   | HD-HOX, MYB                  |
| AT1G30870 | peroxidase 7                                           | -2,8   | -2,4                          | -4,6                           | 1   | C2C2(Zn) Dof, HD-HOX, HD-ZIP |
| AT2G03420 | unknown protein                                        | -7,5   | -2,2                          | -4,5                           | 0   | MYB, HD-HOX, C2C2(Zn) Dof    |
| AT5G17820 | peroxidase 57                                          | -1,8   | -2,0                          | -4,4                           | 0   | HD-HOX, MYB                  |
| AT1G48930 | Glycosyl hydrolase 9C, endoglucanase 5, GH9C1          | -1,6   | -1,5                          | -4,3                           | 0   | AP2/EREBP, MYB, SBP          |
| AT3G05950 | RmlC-like cupins superfamily protein;                  | -2,2   | -1,7                          | -3,4                           | 0   | TBP                          |
| AT4G01450 | nodulin MtN21 /EamA-like transporter protein           | -1,9   | -1,8                          | -2,9                           | 0   | MYB                          |
| AT4G28040 | nodulin MtN21 /EamA-like transporter protein           | -1,8   | -2,4                          | -2,7                           | 0   | AP2/EREBP, MYB, HD-ZIP       |
| AT1G14345 | NAD(P)-linked oxidoreductase superfamily protein       | -8,2   | -2,7                          | -2,6                           | 0   | bZIP, MYB                    |
| AT4G23270 | cysteine-rich receptor-like protein kinase 19, CRK19   | -2,4   | -3,5                          | -2,5                           | 0   | HD-HOX                       |
| AT3G23800 | selenium-binding protein 3, SBP3                       | -1,8   | -1,8                          | -2,5                           | 1   | AP2/EREBP, MYB, HD-ZIP, MADS |
| AT5G44820 | Nucleotide-diphospho-sugar transferase protein         | -1,8   | -4,1                          | -2,4                           | 1   | HSFB                         |
| AT5G59320 | non-specific lipid-transfer protein 3, LTP3            | -3,6   | -2,2                          | -2,4                           | 0   | C2C2(Zn) Dof, TBP            |
| AT4G30290 | xyloglucan:xyloglucosyl transferase, XTH19             | -2,7   | -6,6                          | -2,4                           | 2   | HSFB                         |
| AT1G14960 | major latex-related protein                            | -2,5   | -2,1                          | -2,4                           | 0   | HD-ZIP                       |
| AT3G58100 | Plasmodesmata callose-binding protein 5, PDCB5         | -2,2   | -2,0                          | -2,1                           | 1   | MYB, HD-HOX, bZIP            |
| AT5G42180 | peroxidase 64                                          | -2,1   | -1,9                          | -2,1                           | 0   | MYB                          |
| AT3G63110 | IPT3, isopentenyltransferase 3                         | -2,2   | -2,3                          | -2,0                           | 0   | ABI3/VP1, MYB, HD-HOX        |
| AT4G30650 | Low temperature and salt responsive protein            | -4,3   | -1,9                          | -2,0                           | 0   | AP2/EREBP, HD-HOX, MYB       |
| AT5G22860 | Serine carboxypeptidase S28 family protein;            | -2,0   | -2,6                          | -2,0                           | 1   | HD-HOX                       |
| AT5G64620 | Cell wall/vacuolar inhibitor of fructosidase 2, C/VIF2 | -3,2   | -1,8                          | -1,9                           | 0   | HD-HOX, HD-ZIP               |
| AT2G40080 | Early flowering 4, ELF4                                | -2,5   | -2,2                          | -1,9                           | 0   | HSFB                         |
| AT5G26260 | TRAF-like family protein;                              | -2,0   | -3,0                          | -1,9                           | 0   |                              |
| AT3G58990 | isopropylmalate isomerase 1, IPMI1                     | -1,7   | -2,7                          | -1,9                           | 0   | AP2/EREBP, MYB, HD-HOX       |
| AT4G23690 | Disease resistance-responsive (dirigent-like) protein  | -2,8   | -1,9                          | -1,8                           | 1   | HD-HOX, MYB, C2C2(Zn) Dof    |
| AT1G53900 | Eukaryotic translation initiation factor 2B (eIF-2B)   | -1,8   | -2,2                          | -1,8                           | 0   | HD-HOX                       |
| AT5G42250 | Zinc-binding alcohol dehydrogenase family protein;     | -2,2   | -2,3                          | -1,8                           | 3   | MYB, HD-ZIP                  |
| AT3G21770 | Peroxidase superfamily protein;                        | -1,8   | -2,1                          | -1,8                           | 0   |                              |
| AT2G36485 | ENTH/VHS family protein;                               | -1,8   | -2,5                          | -1,8                           | 0   | AP2/EREBP, MYB, HD-HOX       |
| AT4G30660 | Low temperature and salt responsive protein            | -2,1   | -4,1                          | -1,8                           | 1   | HSFB, HD-HOX, HD-ZIP         |
| AT3G03480 | acetyl CoA:(Z)-3-hexen-1-ol acetyltransferase, CHAT    | -2,3   | -2,9                          | -1,7                           | 0   | AP2/EREBP, MYB, HD-HOX       |
| AT5G50160 | ferric reduction oxidase 8, FRO8                       | -2,4   | -1,8                          | -1,7                           | 0   | AP2/EREBP, HD-HOX, MYB       |
| AT3G25805 | unknown protein                                        | -2,3   | -2,9                          | -1,7                           | 0   | AP2/EREBP                    |
| AT1G49720 | ABA responsive element-binding factor 1, ABF1          | -2,3   | -2,0                          | -1,7                           | 0   | AP2/EREBP, GATA              |
| AT2G25210 | Ribosomal protein L39 family protein                   | -2,2   | -2,5                          | -1,6                           | 0   | MYB                          |
| AT3G53190 | Pectin lyase-like superfamily protein                  | -2,4   | -1,7                          | -1,6                           | 0   | MYB                          |
| AT3G05880 | Rare-cold-inducible 2A, RC12A                          | -2,2   | -3,2                          | -1,6                           | 1   | HD-HOX, MYB                  |
| AT2G21210 | SAUR-like auxin-responsive protein                     | -3,0   | -1,9                          | -1,6                           | 0   | TBP, MYB                     |



List of genes found commonly downregulated by HSFA4A overexpression and H<sub>2</sub>O<sub>2</sub> treatments. **Categories:** AGI, Protein, HSFA4A, H<sub>2</sub>O<sub>2</sub>, HSFA4A+H<sub>2</sub>O<sub>2</sub>, HSE and Other TF are the same as in Table S3. According to Genevestigator ([www.genevestigator.com](http://www.genevestigator.com)) data, 75% of these genes are downregulated by abiotic stresses (UV light, drought, osmotic, hypoxia, ozone), repressed by SA, and induced during germination.

**Table S5.** Occurrence of predicted transcription factor binding sites in promoter regions of HSFA4A and hydrogen peroxide induced or repressed genes (listed on tables S3 and S4). Bold letter indicate binding sites which were overrepresented in upregulated genes, while bold italics shows those which were more frequent in downregulated genes. Data were assembled using the Promomer ([bar.utoronto.ca](http://bar.utoronto.ca)) and AthaMap promoter ([www.athamap.de](http://www.athamap.de)) search tools.

| <b>TF binding sites</b>     | <b>% of sites in induced genes</b> | <b>% of sites in repressed genes</b> |
|-----------------------------|------------------------------------|--------------------------------------|
| <b>HSF</b>                  | <b>70</b>                          | <b>33</b>                            |
| <b>HSFB</b>                 | <b>33</b>                          | <b>10</b>                            |
| <b>Trihelix</b>             | <b>30</b>                          | <b>6</b>                             |
| <b>MYC_MYB</b>              | <b>63</b>                          | <b>29</b>                            |
| ABI3/VP1                    | 3                                  | 2                                    |
| C2H2(Zn)                    | 3                                  | 2                                    |
| SBP                         | 3                                  | 2                                    |
| bZIP_DOF                    | 103                                | 69                                   |
| LFY                         | 33                                 | 27                                   |
| C2C2(Zn) Dof                | 15                                 | 12                                   |
| AP2/EREBP                   | 55                                 | 49                                   |
| HOX2a_HOX2a                 | 115                                | 110                                  |
| HD-HOX                      | 62                                 | 59                                   |
| RAV                         | 17                                 | 16                                   |
| MYB                         | 207                                | 204                                  |
| bZIP                        | 27                                 | 27                                   |
| TSS                         | 100                                | 102                                  |
| GATA                        | 15                                 | 16                                   |
| GARP/ARR-B                  | 10                                 | 12                                   |
| CAMTA                       | 3                                  | 4                                    |
| WRKY(Zn)                    | 23                                 | 29                                   |
| <b><i>MADS</i></b>          | <b><i>43</i></b>                   | <b><i>65</i></b>                     |
| <b><i>C2C2(Zn) GATA</i></b> | <b><i>8</i></b>                    | <b><i>24</i></b>                     |
| <b><i>GRF</i></b>           | <b><i>3</i></b>                    | <b><i>10</i></b>                     |
| <b><i>TBP</i></b>           | <b><i>2</i></b>                    | <b><i>6</i></b>                      |
| <b><i>HD-ZIP</i></b>        | <b><i>2</i></b>                    | <b><i>16</i></b>                     |
| CBF                         | 3                                  | 0                                    |
| HD-KNOTTED                  | 2                                  | 0                                    |
| NAC                         | 2                                  | 0                                    |
| TCP                         | 5                                  | 0                                    |

**Table S6.** List of oligonucleotides used in this study.

| Code                    | 5' - 3' sequence                              | Use                                                     | Reference  |
|-------------------------|-----------------------------------------------|---------------------------------------------------------|------------|
| HsfA4A-seq2F            | GCTTGCTTTGAACCTATCGCCG                        | HsfA4A (AT4G18880) cDNA sequencing                      | This study |
| HsfA4A-seq4F            | GACGGATTCAGAACGAGTGAGAATG                     | HsfA4A (AT4G18880) cDNA sequencing                      | This study |
| HsfA4A-seqR             | CACTCGTTCTGAATCCGTCA                          | HsfA4A (AT4G18880) cDNA sequencing                      | This study |
| HsfA4A-seq7R            | GCGATAGTTCAAAGCAAGC                           | HsfA4A (AT4G18880) cDNA sequencing                      | This study |
| hsfa4a_gen_F            | CATTCCACCAAACCCAATCTTTGT                      | <i>hsfa4a</i> mutant gene-specific (genotyping)         | This study |
| hsfa4a_gen_R            | TTGGTGAGGAAAGGTGGAAGTG                        | <i>hsfa4a</i> mutant gene-specific (genotyping)         | This study |
| HsfA4A-RT-F             | CGAGCAACGGGAAGT TCAATTAGA                     | RT-PCR of HsfA4A gene                                   | This study |
| HsfA4A-RT-R             | CTGAACCATACCTAAGTACTGTAATCGAAAAC              | RT-PCR of HsfA4A gene                                   | This study |
| HsfA4A-qF               | CTTTGAACCTATCGCCGTGT                          | HsfA4A (AT4G18880) Q-RT-PCR                             | This study |
| HsfA4A-qR               | TGTGTGTGAAGAAGGGCTTG                          | HsfA4A (AT4G18880) Q-RT-PCR                             | This study |
| Hsf-prom-5(EcoRI):      | TGACTGAATTCCCACATTCCACACTTGCCTTT              | HsfA4A promoter cloning in pENTRY-BS (-)                | This study |
| Hsf-prom-3(BamHI)_noATG | TGATTGGATCCCTCTGAAAACACTTTTAAACAACCTCTCACACTC | HsfA4A promoter cloning in pENTRY-BS (-)                | This study |
| Hsf-prom-seq1F          | AATTCGTCCTACTCCGACCA                          | HsfA4A promoter sequencing                              | This study |
| Hsf-prom-seq2F          | TGATCCGACTTTTTCTTGAC                          | HsfA4A promoter sequencing                              | This study |
| Hsf-prom-seq3F          | ATCGTCGTCGTCGTAAATCC                          | HsfA4A promoter sequencing                              | This study |
| HsfA4A-5'(BamHI)        | TGAGCGGATCCATGGATGAGAATAATCATGGAGTTTC         | Cloning in pPCV-Y/CFP-H, pET28a, pMALC2, pGAD424, pGBT9 | This study |
| HsfA4A-5'(Hind III)     | TGAGCAAGCTTATGGATGAGAATAATCATGGAGTTTC         | Cloning in pSAT1A, pPILY                                | This study |
| HsfA4A-3'(SmaI)_noSTOP  | TGATCCCCGGGACTTCTCTCTGAAGAAGTCAGAT            | Cloning in pSAT1A, pPILY, pPCV-Y/CFP-H                  | This study |
| HsfA4A-3'(HindIII)      | AAGCTTATCAACTTCTCTCTGAAGAAGTCAGAT             | Cloning in pET28a, pMALC2                               | This study |
| HsfA4A-3'(Sall)         | TGAGCGTCGACTCAACTTCTCTCTGAAGAAGTCAGAT         | Cloning in pGAD424, pGBT9                               | This study |
| MPK3-5'(BamHI)          | TGAGCGG ATC CAA ATGAACACCGGCGGTGGCCAATAC      | Cloning in pET28c, pGAD424, pGBT9                       | This study |
| MPK6-5'(BamHI)          | TGAGCGG ATC CTC ATGGACGGTGGTTCAGGTCAACCGGC    | Cloning in pET28c, pGAD424, pGBT9                       | This study |

|               |                                             |                                            |                      |
|---------------|---------------------------------------------|--------------------------------------------|----------------------|
| MPK3-3'(Sall) | TGAGCGTCGACCTAACCGTATGTTGGATTGAGTGC         | Cloning in pET28c, pGAD424, pGBT9          | This study           |
| MPK6-3'(Sall) | TGAGCGTCGACCTATTGCTGATATTCTGGATTGAAAG       | Cloning in pET28c, pGAD424, pGBT9          | This study           |
| 3'C229_Hsf_R  | CCTTCCTCTCTCACAACAACAGCAGTTTTGTTCTCTTCCAACA | HsfA4A Site-directed mutagenesis, C229A    | This study           |
| 3'C267_Hsf_R  | GATTGTAACATACTCTCAGCAGAATCCGATAACAAG        | HsfA4A Site-directed mutagenesis, C267A    | This study           |
| 3'C295_Hsf_R  | GAATCGACACTTAACTGTATAGCAGAAAGAGGAGGGCTCTCTG | HsfA4A Site-directed mutagenesis, C295A    | This study           |
| Hsp17.6A-qF   | CCAAAGAAAAAGCCAAGAAGC                       | Hsp17.6A gene (AT5G12030) quantitative PCR | This study           |
| Hsp17.6A-qR   | TGGAAACCTTCCAAACTCCA                        | Hsp17.6A gene (AT5G12030) quantitative PCR | This study           |
| Zat6-qF       | GTGACCTTGACCTGCCTTCTTC                      | Zat6 gene (AT5G04340) quantitative PCR     | This study           |
| Zat6-qR       | CTCCGGCAGATTGAGTAAGC                        | Zat6 gene (AT5G04340) quantitative PCR     | This study           |
| Zat12-qF      | GACGCTTTGTCGTCTGGATT                        | Zat12 gene (AT5G59820) quantitative PCR    | This study           |
| Zat12-qR      | GTGTCCTCCCAAAGCTTGTC                        | Zat12 gene (AT5G59820) quantitative PCR    | This study           |
| Hsp90-qF      | GTGGTTCCTTCACTGTCCTAG                       | Hsp90 gene (AT5G52640) quantitative PCR    | This study           |
| Hsp90-qR      | TTCACCAAGTCTTTGAGTCTCC                      | Hsp90 gene (AT5G52640) quantitative PCR    | This study           |
| ER8A          | GCTTGGGCTGCAGGTCGAGGCTAA                    | amplification of inserts in pER8 vector    | Papdi et al., 2008   |
| ER8B          | CTGGTGTGTGGCAATGAAACTGATGC                  | amplification of inserts in pER8 vector    | Papdi et al., 2008   |
| GAPDH2_qF     | AATGGAAAATTGACCGGAATGT                      | GAPDH2 (AT1G13440) Q-RTPCR reference       | Papdi et al., 2008   |
| GAPDH2_qR     | CGGTGAGATCAACAACCTGAGACA                    | GAPDH2 (AT1G13440) Q-RTPCR reference       | Papdi et al., 2008   |
| Tubulin2-RT-F | AGGAACTGGATCTGGTATGGGAACAT                  | tubulin 2 (AT5G62690) Q-RTPCR reference    | Koncz C.,            |
| Tubulin2-RT-R | GTCACACCAGACATAGTAGCAGAAATCAAG              | tubulin 2 (AT5G62690) Q-RTPCR reference    | Koncz C.,            |
| DONR1         | TCGCGTTAACGCTAGCATGGATCTC                   | pDONR201 sequencing                        | Invitrogen           |
| DONR2         | GTAACATCAGAGATTTTGAGACAC                    | pDONR201 sequencing                        | Invitrogen           |
| LB-4          | CGTGTGCCAGGTGCCACGGAATAGT                   | Left border T-DNA-specific (genotyping)    | INRA                 |
| WRKY30-qF     | AGAGCGATGATTCCGATCAAG                       | WRKY30 gene (AT5G24110) quantitative PCR   | Besseau et al., 2012 |
| WRKY30-qR     | CATCGTCCAGCGTTCTATCAA                       | WRKY30 gene (AT5G24110) quantitative PCR   | Besseau et al., 2012 |
| PDC-qF        | CGATTATGGCACTAACCGGATT                      | PDC1 gene (At4g33070) quantitative PCR     | Banti et al., 2010   |

|                        |                                               |                                        |                    |
|------------------------|-----------------------------------------------|----------------------------------------|--------------------|
| PDC-qR                 | TGTTCCACCACCGCCTGATAAC                        | PDC1 gene (At4g33070) quantitative PCR | Banti et al., 2010 |
| ADH-qF                 | GAATCGCTGGTGCTTCTAGG                          | ADH1 gene (At1g77120) quantitative PCR | Papdi et al., 2008 |
| ADH-qR                 | CTCAGCGATCACCTGTTGAA                          | ADH1 gene (At1g77120) quantitative PCR | Papdi et al., 2008 |
| 3' S198A_Hsf_R         | GGGAACACACGGAGCTAGGTTCAAAGC                   | HsfA4A Site-directed mutagenesis       | This study         |
| 3' T238A_Hsf_R         | TGAAGAAGGGCTAGCAGAACCTTCCTC                   | HsfA4A Site-directed mutagenesis       | This study         |
| 3' S239A_Hsf_R         | GTGTGAAGAAGGAGCTGTAGAACCTTC                   | HsfA4A Site-directed mutagenesis       | This study         |
| 5' S309A_Hsf_F         | CAAATCTCCTCCTGCTCCAAGGATCATC                  | HsfA4A Site-directed mutagenesis       | This study         |
| 3' T396A_Hsf_R-HindIII | AGTCAAAGCTTATCAACTTCTCTCTGAAGAAGCCAGATGTCCAAG | HsfA4A Site-directed mutagenesis       | This study         |
| 5' Hsp-prom_EcoRI      | TGACTGAATTCCGGACTGTTCCAAATTTCT                | Hsp17.6A promoter cloning in pPCV-LUC+ | This study         |
| 3' Hsp-prom_SalI       | TGATTGTCGACTCTTAGCTGTTGTGTTAACTTCC            | Hsp17.6A promoter cloning in pPCV-LUC+ | This study         |

## References:

- Besseau S, Li J, Palva ET (2012) WRKY54 and WRKY70 co-operate as negative regulators of leaf senescence in *Arabidopsis thaliana*. *J Exp Bot* 63, 2667–2679
- Papdi, C., Abraham, E., Joseph, M.P., Popescu, C., Koncz, C., Szabados, L. (2008). Functional identification of *Arabidopsis* stress regulatory genes using the controlled cDNA overexpression system. *Plant Physiol* 147, 528-542.
- Banti V, Mafessoni F, Loreti E, Alpi A, Perata P. (2010). The heat-inducible transcription factor HsfA2 enhances anoxia tolerance in *Arabidopsis*. *Plant Physiol.* 152(3):1471-83.

**Phospho-Ser198.** Corresponding phosphopeptide represents [179-207] of HSFA4A (Uniprot ID:O49403)

**TMVSFVSQVLEK PGLALNLS(Phospho)PC(Carbamidomethyl)VPETNER<sup>+3</sup>**

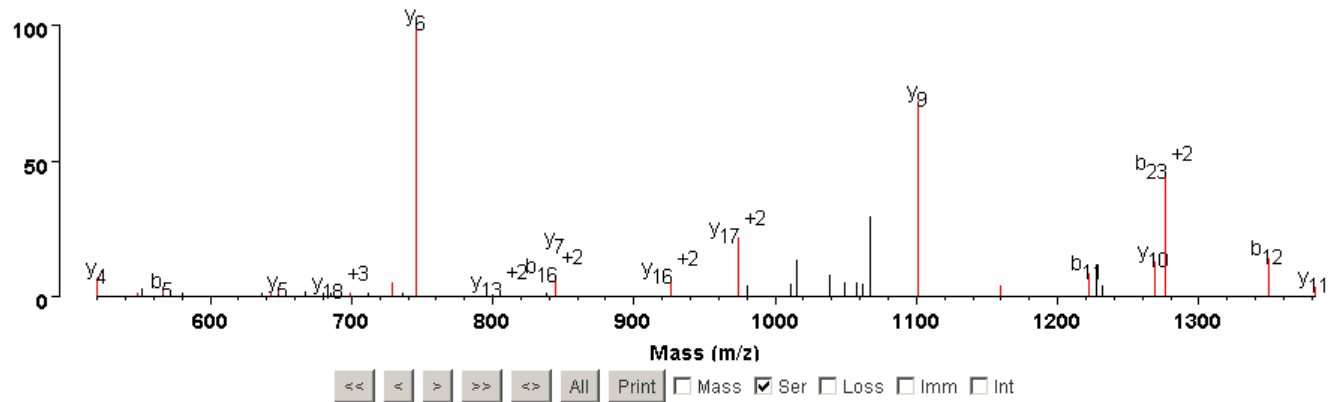

Max Intensity: 4721

Num Matched: 20/40 (50.0% unmatched) Matched Intensity: 74.7% Matched Series Intensity: 74.7%

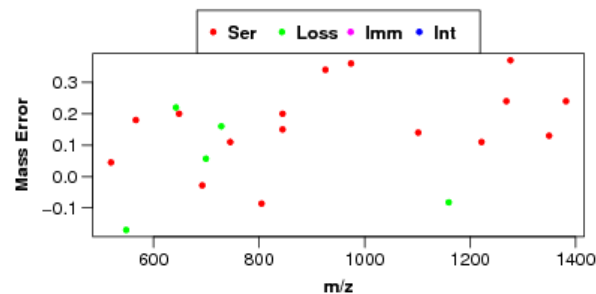

|                                     |                                                          |            |                          |
|-------------------------------------|----------------------------------------------------------|------------|--------------------------|
| N Term                              | Sequence                                                 | C Term     | N Loss                   |
| <input checked="" type="checkbox"/> | TMVSFVSQVLEK PGLALNLS(Phospho)PC(Carbamidomethyl)VPETNER |            |                          |
| [+] Additional Sequences            |                                                          |            |                          |
| Max Charge                          | Count Basic AA                                           | Max Losses | Multi Z Internal         |
| 3                                   |                                                          | 1          | <input type="checkbox"/> |
| Max Internal Len                    | 200                                                      |            |                          |
| Max MSMS Pks                        | Frag Tol                                                 | Da         | Cal                      |
|                                     | 0.4                                                      |            | <input type="checkbox"/> |
| Cal Tol (Da)                        | 0.4                                                      |            |                          |
| Centroid                            | MS-Product                                               | Output     | HTML                     |
|                                     |                                                          |            |                          |
| [+] Ion Types                       |                                                          |            |                          |

Elemental Composition: [C140 H233 N37 O48 S2 P1](#)

| MH <sup>+1</sup> (av) | MH <sup>+1</sup> (mono) | MH <sup>+2</sup> (av) | MH <sup>+2</sup> (mono) | MH <sup>+3</sup> (av) | MH <sup>+3</sup> (mono) |
|-----------------------|-------------------------|-----------------------|-------------------------|-----------------------|-------------------------|
| 3297.7341             | 3295.6102               | 1649.3707             | 1648.3088               | 1099.9163             | 1099.2083               |

**[-] Peak Matches**

|                                      |                                         |                                                                        |                                                                       |           |                                        |                        |                                                                      |                                        |                        |
|--------------------------------------|-----------------------------------------|------------------------------------------------------------------------|-----------------------------------------------------------------------|-----------|----------------------------------------|------------------------|----------------------------------------------------------------------|----------------------------------------|------------------------|
| 519.2970                             | 548.0850                                | 551.7210                                                               | 566.4400                                                              | 571.4630  | 580.4510                               | 636.4670               | 642.5290                                                             | 648.4960                               | 667.4680               |
| y <sub>4</sub> (0.045)               | b <sub>5</sub> -H <sub>2</sub> O(-0.17) |                                                                        | b <sub>5</sub> (0.18)                                                 |           |                                        |                        | y <sub>11</sub> -H <sub>3</sub> PO <sub>4</sub> <sup>+2</sup> (0.22) | y <sub>5</sub> (0.20)                  |                        |
| 679.7140                             | 685.5370                                | 692.3100                                                               | 699.3850                                                              | 711.4000  | 728.4800                               | 736.5370               | 745.4600                                                             | 804.7720                               | 837.7370               |
|                                      |                                         | y <sub>18</sub> <sup>+3</sup> (-0.028)                                 | y <sub>12</sub> -H <sub>3</sub> PO <sub>4</sub> <sup>+2</sup> (0.057) |           | y <sub>6</sub> -NH <sub>3</sub> (0.16) |                        | y <sub>6</sub> (0.11)                                                | y <sub>13</sub> <sup>+2</sup> (-0.086) |                        |
| 844.6130                             | 925.7720                                | 974.3130                                                               | 980.6970                                                              | 1010.7250 | 1015.0250                              | 1038.4880              | 1049.6050                                                            | 1057.7320                              | 1061.4570              |
| b <sub>16</sub> <sup>+2</sup> (0.15) | y <sub>7</sub> (0.20)                   | y <sub>16</sub> <sup>+2</sup> (0.34)                                   | y <sub>17</sub> <sup>+2</sup> (0.36)                                  |           |                                        |                        |                                                                      |                                        |                        |
| 1067.2420                            | 1101.6400                               | 1159.5300                                                              | 1221.7250                                                             | 1227.9750 | 1231.5260                              | 1268.7340              | 1276.5090                                                            | 1349.8410                              | 1381.8250              |
|                                      | y <sub>9</sub> (0.14)                   | y <sub>21</sub> -H <sub>3</sub> PO <sub>4</sub> <sup>+2</sup> (-0.082) | b <sub>11</sub> (0.11)                                                |           |                                        | y <sub>10</sub> (0.24) | b <sub>23</sub> <sup>+2</sup> (0.37)                                 | b <sub>12</sub> (0.13)                 | y <sub>11</sub> (0.24) |

| $b\text{-H}_3\text{PO}_4$ | $b\text{-H}_3\text{PO}_4^{+2}$ | $b$       | $b^{+2}$  |    |                    | $y$ | $y^{+2}$  | $y\text{-H}_3\text{PO}_4$ | $y\text{-H}_3\text{PO}_4^{+2}$ |
|---------------------------|--------------------------------|-----------|-----------|----|--------------------|-----|-----------|---------------------------|--------------------------------|
| ---                       | ---                            | ---       | ---       | 1  | T                  | 29  | ---       | ---                       | ---                            |
| ---                       | ---                            | 233.0954  | ---       | 2  | M                  | 28  | 3194.5625 | 1597.7849                 | 3096.5857                      |
| ---                       | ---                            | 332.1639  | ---       | 3  | V                  | 27  | 3063.5221 | 1532.2647                 | 2965.5452                      |
| ---                       | ---                            | 419.1959  | ---       | 4  | S                  | 26  | 2964.4536 | 1482.7305                 | 2866.4768                      |
| ---                       | ---                            | 566.2643  | ---       | 5  | F                  | 25  | 2877.4216 | 1439.2144                 | 2779.4447                      |
| ---                       | ---                            | 665.3327  | ---       | 6  | V                  | 24  | 2730.3532 | 1365.6802                 | 2632.3763                      |
| ---                       | ---                            | 752.3647  | ---       | 7  | S                  | 23  | 2631.2848 | 1316.1460                 | 2533.3079                      |
| ---                       | ---                            | 880.4233  | ---       | 8  | Q                  | 22  | 2544.2528 | 1272.6300                 | 2446.2759                      |
| ---                       | ---                            | 979.4917  | ---       | 9  | V                  | 21  | 2416.1942 | 1208.6007                 | 2318.2173                      |
| ---                       | ---                            | 1092.5758 | ---       | 10 | L                  | 20  | 2317.1258 | 1159.0665                 | 2219.1489                      |
| ---                       | ---                            | 1221.6184 | ---       | 11 | E                  | 19  | 2204.0417 | 1102.5245                 | 2106.0648                      |
| ---                       | ---                            | 1349.7133 | 675.3603  | 12 | K                  | 18  | 2074.9991 | 1038.0032                 | 1977.0222                      |
| ---                       | ---                            | 1446.7661 | 723.8867  | 13 | P                  | 17  | 1946.9042 | 973.9557                  | 1848.9273                      |
| ---                       | ---                            | 1503.7876 | 752.3974  | 14 | G                  | 16  | 1849.8514 | 925.4293                  | 1751.8745                      |
| ---                       | ---                            | 1616.8716 | 808.9395  | 15 | L                  | 15  | 1792.8299 | 896.9186                  | 1694.8530                      |
| ---                       | ---                            | 1687.9088 | 844.4580  | 16 | A                  | 14  | 1679.7459 | 840.3766                  | 1581.7690                      |
| ---                       | ---                            | 1800.9928 | 901.0000  | 17 | L                  | 13  | 1608.7087 | 804.8580                  | 1510.7319                      |
| ---                       | ---                            | 1915.0357 | 958.0215  | 18 | N                  | 12  | 1495.6247 | 748.3160                  | 1397.6478                      |
| ---                       | ---                            | 2028.1198 | 1014.5635 | 19 | L                  | 11  | 1381.5818 | 691.2945                  | 1283.6049                      |
| 2097.1413                 | 1049.0743                      | 2195.1182 | 1098.0627 | 20 | S(Phospho)         | 10  | 1268.4977 | 634.7525                  | 1170.5208                      |
| 2194.1940                 | 1097.6007                      | 2292.1709 | 1146.5891 | 21 | P                  | 9   | 1101.4993 | 551.2533                  | ---                            |
| 2354.2247                 | 1177.6160                      | 2452.2016 | 1226.6044 | 22 | C(Carbamidomethyl) | 8   | 1004.4466 | 502.7269                  | ---                            |
| 2453.2931                 | 1227.1502                      | 2551.2700 | 1276.1386 | 23 | V                  | 7   | 844.4159  | 422.7116                  | ---                            |
| 2550.3459                 | 1275.6766                      | 2648.3228 | 1324.6650 | 24 | P                  | 6   | 745.3475  | 373.1774                  | ---                            |
| 2679.3885                 | 1340.1979                      | 2777.3654 | 1389.1863 | 25 | E                  | 5   | 648.2947  | 324.6510                  | ---                            |
| 2780.4361                 | 1390.7217                      | 2878.4130 | 1439.7102 | 26 | T                  | 4   | 519.2522  | 260.1297                  | ---                            |
| 2894.4791                 | 1447.7432                      | 2992.4560 | 1496.7316 | 27 | N                  | 3   | 418.2045  | 209.6059                  | ---                            |
| 3023.5217                 | 1512.2645                      | 3121.4986 | 1561.2529 | 28 | E                  | 2   | 304.1615  | 152.5844                  | ---                            |
| ---                       | ---                            | ---       | ---       | 29 | R                  | 1   | 175.1190  | 88.0631                   | ---                            |



**Phospho-Thr238|Ser239.** Corresponding phosphopeptide represents [228-245] of HSFA4A (Uniprot ID:O49403).

**TC(Carbamidomethyl)VVREEGST(Phospho)SPSSHTR<sup>+3</sup>**

**TC(Carbamidomethyl)VVREEGSTS(Phospho)PSSHTR<sup>+3</sup>**

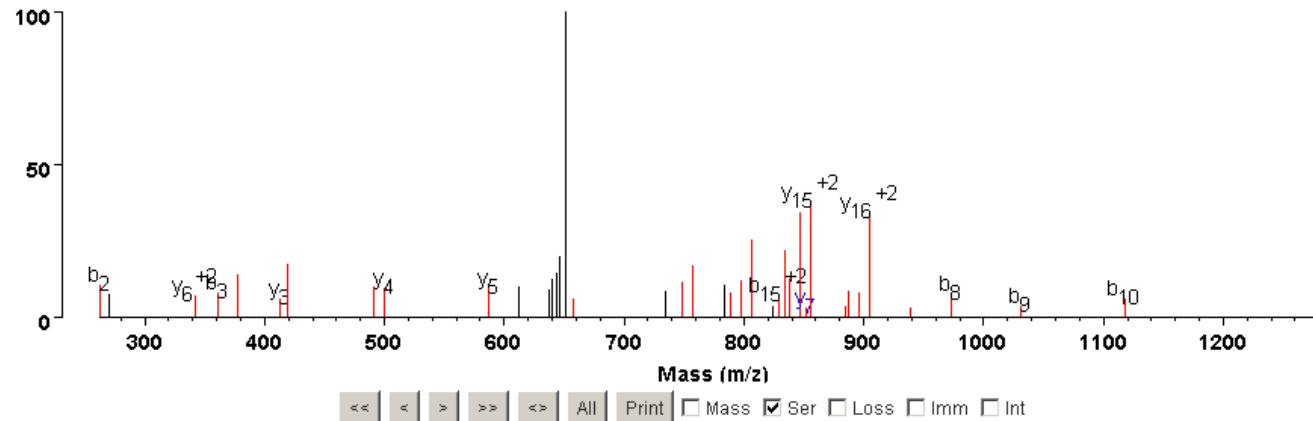

Max Intensity: 1453

Num Matched: 28/40 (30.0% unmatched) Matched Intensity: 60.9% Matched Series Intensity: 60.4%

Num Matched: 30/40 (25.0% unmatched) Matched Intensity: 65.3% Matched Series Intensity: 64.9%

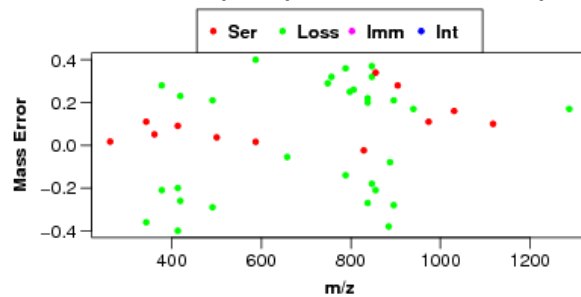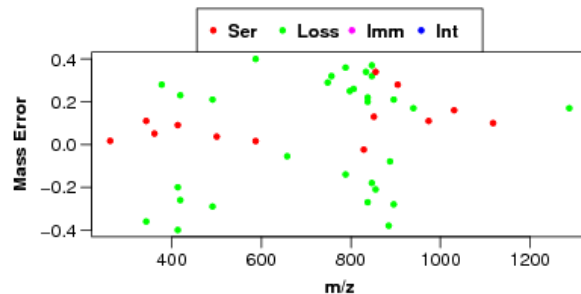

| N Term                                                                                                   | Sequence                                    | C Term | N Loss |
|----------------------------------------------------------------------------------------------------------|---------------------------------------------|--------|--------|
| <input checked="" type="checkbox"/>                                                                      | TC(Carbamidomethyl)VVREEGST(Phospho)SPSSHTR |        |        |
| [-] Additional Sequences                                                                                 |                                             |        |        |
| <input checked="" type="checkbox"/>                                                                      | TC(Carbamidomethyl)VVREEGSTS(Phospho)PSSHTR |        |        |
| <input type="checkbox"/>                                                                                 |                                             |        |        |
| <input type="checkbox"/>                                                                                 |                                             |        |        |
| <input type="checkbox"/>                                                                                 |                                             |        |        |
| Alt <input checked="" type="checkbox"/> Discriminating <input type="checkbox"/> Link Search Type No Link |                                             |        |        |
| Max Charge 3 Count Basic AA Max Losses 2 Multi Z Internal <input type="checkbox"/> Max Internal Len 200  |                                             |        |        |
| Max MSMS Pks Frag Tol 0.4 Da Cal <input type="checkbox"/> Cal Tol (Da) 0.4                               |                                             |        |        |
| Centroid MS-Product Output HTML                                                                          |                                             |        |        |
| [+] Ion Types                                                                                            |                                             |        |        |

Elemental Composition: [C79 H135 N27 O34 S1 P1](#)

| MH <sup>+</sup> 1(av) | MH <sup>+</sup> 1(mono) | MH <sup>+</sup> 2(av) | MH <sup>+</sup> 2(mono) | MH <sup>+</sup> 3(av) | MH <sup>+</sup> 3(mono) |
|-----------------------|-------------------------|-----------------------|-------------------------|-----------------------|-------------------------|
| 2070.1520             | 2068.9118               | 1035.5797             | 1034.9595               | 690.7223              | 690.3088                |

**Peak Matches**

| 262.1030                                                                                                      | 269.9970                                                                                                                              | 342.7810                                                                                  | 361.2050                                                                                                         | 377.4640                                                                                                                                                                              | 413.3170                                                                                                                                                                        | 418.9380                                                                                                                                                                               | 490.9370                                                                                                                                                                                                        | 500.2950                                                                                                                                                                                                                                          | 587.3060                                                                                             |
|---------------------------------------------------------------------------------------------------------------|---------------------------------------------------------------------------------------------------------------------------------------|-------------------------------------------------------------------------------------------|------------------------------------------------------------------------------------------------------------------|---------------------------------------------------------------------------------------------------------------------------------------------------------------------------------------|---------------------------------------------------------------------------------------------------------------------------------------------------------------------------------|----------------------------------------------------------------------------------------------------------------------------------------------------------------------------------------|-----------------------------------------------------------------------------------------------------------------------------------------------------------------------------------------------------------------|---------------------------------------------------------------------------------------------------------------------------------------------------------------------------------------------------------------------------------------------------|------------------------------------------------------------------------------------------------------|
| b <sub>2</sub> (0.017)                                                                                        |                                                                                                                                       | y <sub>6</sub> <sup>+</sup> 2(0.11)<br>b <sub>3</sub> -H <sub>2</sub> O(-0.36)            | b <sub>3</sub> (0.051)                                                                                           | y <sub>7</sub> -NH <sub>3</sub> <sup>+</sup> 2(-0.21)<br>y <sub>7</sub> -H <sub>2</sub> O <sup>+</sup> 2(0.28)<br>y <sub>7</sub> -H <sub>3</sub> PO <sub>4</sub> <sup>+</sup> 2(0.28) | y <sub>3</sub> (0.091)<br>y <sub>12</sub> -H <sub>3</sub> PO <sub>4</sub> -<br>H <sub>2</sub> O <sup>+</sup> 3(-0.20)<br>b <sub>7</sub> -H <sub>2</sub> O <sup>+</sup> 2(-0.40) | y <sub>8</sub> -H <sub>3</sub> PO <sub>4</sub> -<br>H <sub>2</sub> O <sup>+</sup> 2(0.23)<br>y <sub>8</sub> -H <sub>3</sub> PO <sub>4</sub> -<br>NH <sub>3</sub> <sup>+</sup> 2(-0.26) | y <sub>10</sub> -H <sub>3</sub> PO <sub>4</sub> -<br>H <sub>2</sub> O <sup>+</sup> 2(0.21)<br>y <sub>10</sub> -H <sub>3</sub> PO <sub>4</sub> -<br>NH <sub>3</sub> <sup>+</sup> 2(-0.29)                        | y <sub>4</sub> (0.037)                                                                                                                                                                                                                            | y <sub>5</sub> (0.016)<br>b <sub>16</sub> -H <sub>2</sub> O-<br>NH <sub>3</sub> <sup>+</sup> 3(0.40) |
| 612.0490                                                                                                      | 637.6680                                                                                                                              | 639.8930                                                                                  | 643.3510                                                                                                         | 645.7920                                                                                                                                                                              | 651.7770                                                                                                                                                                        | 657.5950                                                                                                                                                                               | 734.2330                                                                                                                                                                                                        | 748.1400                                                                                                                                                                                                                                          | 756.6790                                                                                             |
|                                                                                                               |                                                                                                                                       |                                                                                           |                                                                                                                  |                                                                                                                                                                                       |                                                                                                                                                                                 | MH-H <sub>3</sub> PO <sub>4</sub> <sup>+</sup> 3(-0.055)                                                                                                                               |                                                                                                                                                                                                                 | y <sub>14</sub> -H <sub>3</sub> PO <sub>4</sub> -<br>NH <sub>3</sub> <sup>+</sup> 2(0.29)                                                                                                                                                         | y <sub>14</sub> -H <sub>3</sub> PO <sub>4</sub> <sup>+</sup> 2(0.32)                                 |
| 784.2730                                                                                                      | 788.1890                                                                                                                              | 797.6310                                                                                  | 806.1590                                                                                                         | 824.5590                                                                                                                                                                              | 828.8260                                                                                                                                                                        | 833.6740                                                                                                                                                                               | 837.5860                                                                                                                                                                                                        | 846.7430                                                                                                                                                                                                                                          | 851.4730                                                                                             |
|                                                                                                               | y <sub>14</sub> -2NH <sub>3</sub> <sup>+</sup> 2(-0.14)<br>y <sub>14</sub> -H <sub>2</sub> O-<br>NH <sub>3</sub> <sup>+</sup> 2(0.36) | y <sub>15</sub> -H <sub>3</sub> PO <sub>4</sub> -<br>NH <sub>3</sub> <sup>+</sup> 2(0.25) | y <sub>15</sub> -H <sub>3</sub> PO <sub>4</sub> <sup>+</sup> 2(0.26)                                             |                                                                                                                                                                                       | b <sub>15</sub> <sup>+</sup> 2(-0.024)                                                                                                                                          | y <sub>7</sub> -H <sub>2</sub> O(0.34)                                                                                                                                                 | y <sub>8</sub> -H <sub>3</sub> PO <sub>4</sub> -NH <sub>3</sub> (0.20)<br>y <sub>15</sub> -H <sub>2</sub> O-<br>NH <sub>3</sub> <sup>+</sup> 2(0.22)<br>y <sub>15</sub> -2NH <sub>3</sub> <sup>+</sup> 2(-0.27) | y <sub>16</sub> -H <sub>3</sub> PO <sub>4</sub> -<br>NH <sub>3</sub> <sup>+</sup> 2(-0.18)<br>y <sub>16</sub> -H <sub>3</sub> PO <sub>4</sub> -<br>H <sub>2</sub> O <sup>+</sup> 2(0.32)<br>y <sub>15</sub> -NH <sub>3</sub> <sup>+</sup> 2(0.37) | y <sub>7</sub> (0.13)                                                                                |
| 855.2230                                                                                                      | 884.5350                                                                                                                              | 887.3150                                                                                  | 895.6300                                                                                                         | 904.7030                                                                                                                                                                              | 939.5580                                                                                                                                                                        | 973.5860                                                                                                                                                                               | 1030.6550                                                                                                                                                                                                       | 1117.6350                                                                                                                                                                                                                                         | 1287.7680                                                                                            |
| y <sub>16</sub> -H <sub>3</sub> PO <sub>4</sub> <sup>+</sup> 2(-0.21)<br>y <sub>15</sub> <sup>+</sup> 2(0.34) | b <sub>17</sub> -H <sub>3</sub> PO <sub>4</sub> <sup>+</sup> 2(-0.38)                                                                 | y <sub>16</sub> -2NH <sub>3</sub> <sup>+</sup> 2(-0.079)                                  | y <sub>16</sub> -H <sub>2</sub> O <sup>+</sup> 2(0.21)<br>y <sub>16</sub> -NH <sub>3</sub> <sup>+</sup> 2(-0.28) | y <sub>16</sub> <sup>+</sup> 2(0.28)                                                                                                                                                  | b <sub>17</sub> -NH <sub>3</sub> <sup>+</sup> 2(0.17)                                                                                                                           | b <sub>8</sub> (0.11)                                                                                                                                                                  | b <sub>9</sub> (0.16)                                                                                                                                                                                           | b <sub>10</sub> (0.10)                                                                                                                                                                                                                            | b <sub>12</sub> -H <sub>3</sub> PO <sub>4</sub> (0.17)                                               |

**Main Sequence Ions**

| b-H <sub>3</sub> PO <sub>4</sub> | b-H <sub>3</sub> PO <sub>4</sub> <sup>+</sup> 2 | b         | b <sup>+</sup> 2 |    |                    | y  | y <sup>+</sup> 2 | y-H <sub>3</sub> PO <sub>4</sub> | y-H <sub>3</sub> PO <sub>4</sub> <sup>+</sup> 2 |          |
|----------------------------------|-------------------------------------------------|-----------|------------------|----|--------------------|----|------------------|----------------------------------|-------------------------------------------------|----------|
| ---                              | ---                                             | ---       | ---              | 1  | T                  | 18 | ---              | ---                              | ---                                             |          |
| ---                              | ---                                             | 262.0856  | ---              | 2  | C(Carbamidomethyl) | 17 | 1967.8641        | 984.4357                         | 1869.8872                                       | 935.4472 |
| ---                              | ---                                             | 361.1540  | ---              | 3  | Y                  | 16 | 1807.8334        | 904.4204                         | 1709.8565                                       | 855.4319 |
| ---                              | ---                                             | 460.2224  | ---              | 4  | Y                  | 15 | 1708.7650        | 854.8861                         | 1610.7881                                       | 805.8977 |
| ---                              | ---                                             | 559.2908  | ---              | 5  | Y                  | 14 | 1609.6966        | 805.3519                         | 1511.7197                                       | 756.3635 |
| ---                              | ---                                             | 715.3920  | 858.1996         | 6  | R                  | 13 | 1510.6282        | 755.8177                         | 1412.6513                                       | 706.8293 |
| ---                              | ---                                             | 844.4345  | 422.7209         | 7  | E                  | 12 | 1354.5271        | 677.7672                         | 1256.5502                                       | 628.7787 |
| ---                              | ---                                             | 973.4771  | 487.2422         | 8  | E                  | 11 | 1225.4845        | 613.2459                         | 1127.5076                                       | 564.2574 |
| ---                              | ---                                             | 1030.4986 | 515.7529         | 9  | G                  | 10 | 1096.4419        | 548.7246                         | 998.4650                                        | 499.7361 |
| ---                              | ---                                             | 1117.5306 | 559.2690         | 10 | S                  | 9  | 1039.4204        | 520.2139                         | 941.4435                                        | 471.2254 |
| 1200.5677                        | 600.7875                                        | 1298.5446 | 649.7760         | 11 | T(Phospho)         | 8  | 952.3884         | 476.6978                         | 854.4115                                        | 427.7094 |
| 1287.5998                        | 644.3035                                        | 1385.5767 | 693.2920         | 12 | S                  | 7  | 771.3744         | 386.1908                         | ---                                             | ---      |
| 1384.6525                        | 692.8299                                        | 1482.6294 | 741.8184         | 13 | P                  | 6  | 684.3424         | 342.6748                         | ---                                             | ---      |
| 1471.6846                        | 736.3459                                        | 1569.6615 | 785.3344         | 14 | S                  | 5  | 587.2896         | 294.1484                         | ---                                             | ---      |
| 1558.7166                        | 779.8619                                        | 1656.6935 | 828.8504         | 15 | S                  | 4  | 500.2576         | 250.6324                         | ---                                             | ---      |
| 1695.7755                        | 848.3914                                        | 1793.7524 | 897.3798         | 16 | H                  | 3  | 413.2255         | 207.1164                         | ---                                             | ---      |
| 1796.8232                        | 898.9152                                        | 1894.8001 | 947.9037         | 17 | T                  | 2  | 276.1666         | 138.5870                         | ---                                             | ---      |
| ---                              | ---                                             | ---       | ---              | 18 | R                  | 1  | 175.1190         | 88.0631                          | ---                                             | ---      |

**Unassigned fragment ion m/z 651.8 corresponds to double neutral loss of phosphoric acid and water from the precursor peptide**

**Phospho-Ser309.** Corresponding phosphopeptide represents [304-311] of HSFA4A (Uniprot ID:O49403)

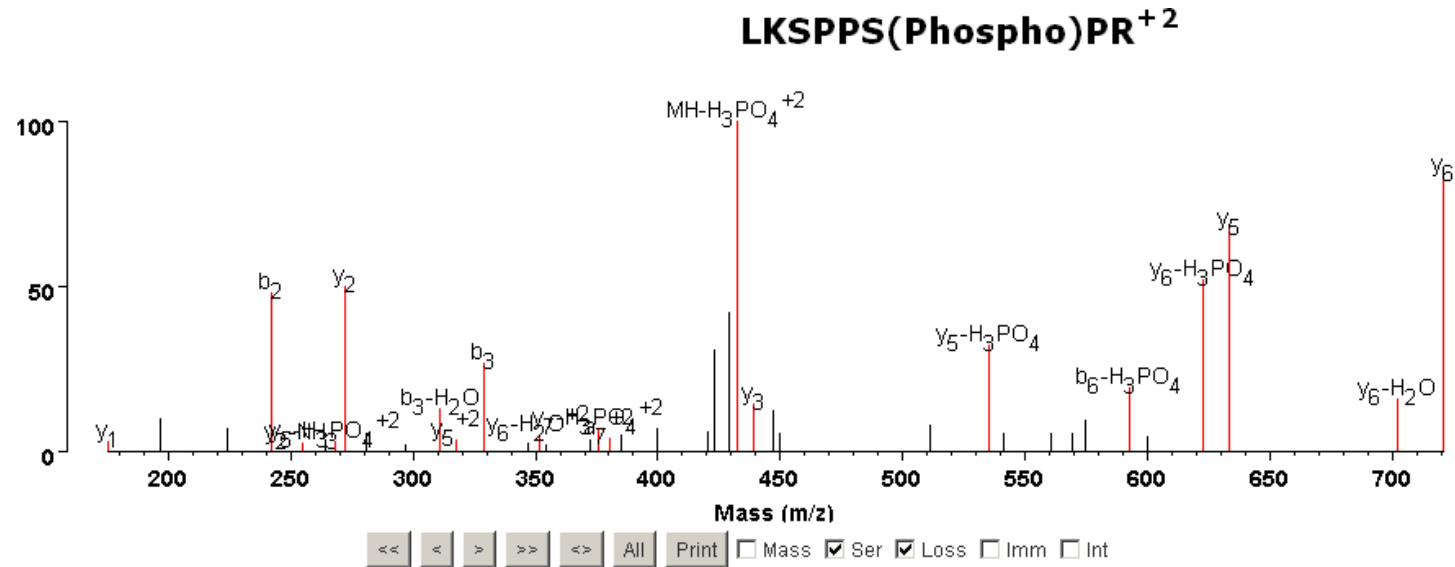

Max Intensity: 1344

Num Matched: 19/40 (52.5% unmatched) Matched Intensity: 74.7% Matched Series Intensity: 70.8%

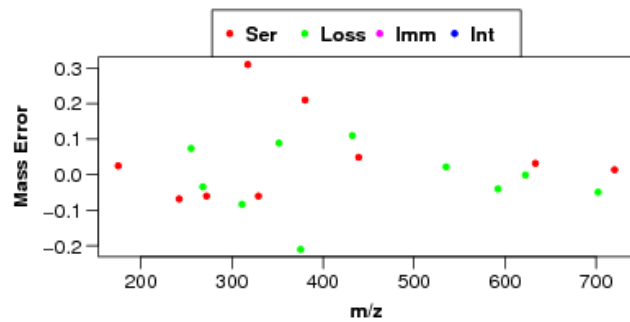

|                                     | N Term | Sequence          | C Term           | N Loss                                        |
|-------------------------------------|--------|-------------------|------------------|-----------------------------------------------|
| <input checked="" type="checkbox"/> |        | LKSPPS(Phospho)PR |                  |                                               |
| [+] Additional Sequences            |        |                   |                  |                                               |
| Max Charge                          |        | 2                 | Count Basic AA   |                                               |
| Max Losses                          |        | 1                 | Multi Z Internal | <input type="checkbox"/>                      |
| Max Internal Len                    |        | 200               |                  |                                               |
| Max MSMS Pks                        |        |                   | Frag Tol         | 0.4                                           |
|                                     |        |                   | Da               | Cal <input type="checkbox"/> Cal Tol (Da) 0.4 |
| Centroid                            |        |                   | MS-Product       | Output HTML                                   |
| [+] Ion Types                       |        |                   |                  |                                               |

Elemental Composition: [C39 H70 N12 O14 P1](#)

| MH <sup>+</sup> 1(av) | MH <sup>+</sup> 1(mono) | MH <sup>+</sup> 2(av) | MH <sup>+</sup> 2(mono) |
|-----------------------|-------------------------|-----------------------|-------------------------|
| 962.0366              | 961.4867                | 481.5220              | 481.2470                |

**[-] Peak Matches**

|                                          |                                     |                         |                         |                                                         |                        |                                                                       |                                                                      |                                          |                                                        |
|------------------------------------------|-------------------------------------|-------------------------|-------------------------|---------------------------------------------------------|------------------------|-----------------------------------------------------------------------|----------------------------------------------------------------------|------------------------------------------|--------------------------------------------------------|
| 175.1440                                 | 197.1040                            | 224.0730                | 242.1180                | 255.2190                                                | 264.1920               | 268.1190                                                              | 272.1120                                                             | 281.0620                                 | 297.1980                                               |
| y <sub>1</sub> (0.025)                   |                                     |                         | b <sub>2</sub> (-0.068) | y <sub>2</sub> -NH <sub>3</sub> (0.074)                 |                        | y <sub>5</sub> -H <sub>3</sub> PO <sub>4</sub> <sup>+2</sup> (-0.034) | y <sub>2</sub> (-0.060)                                              |                                          |                                                        |
| 311.1250                                 | 317.4550                            | 329.1580                | 346.8980                | 351.7410                                                | 354.1840               | 372.1180                                                              | 375.5020                                                             | 380.4050                                 | 384.7750                                               |
| b <sub>3</sub> -H <sub>2</sub> O(-0.083) | y <sub>5</sub> <sup>+2</sup> (0.31) | b <sub>3</sub> (-0.060) |                         | y <sub>6</sub> -H <sub>2</sub> O <sup>+2</sup> (0.089)  |                        |                                                                       | y <sub>7</sub> -H <sub>3</sub> PO <sub>4</sub> <sup>+2</sup> (-0.21) | a <sub>7</sub> <sup>+2</sup> (0.21)      |                                                        |
| 399.5220                                 | 420.2890                            | 423.3290                | 428.8630                | 432.3660                                                | 439.2190               | 446.9310                                                              | 449.4720                                                             | 511.0010                                 | 535.3210                                               |
|                                          |                                     |                         |                         | MH-H <sub>3</sub> PO <sub>4</sub> <sup>+2</sup> (0.11)  | y <sub>3</sub> (0.049) |                                                                       |                                                                      |                                          | y <sub>5</sub> -H <sub>3</sub> PO <sub>4</sub> (0.022) |
| 541.1710                                 | 560.2280                            | 568.9080                | 574.3860                | 592.3050                                                | 599.8280               | 622.3300                                                              | 633.3080                                                             | 702.2480                                 | 720.3220                                               |
|                                          |                                     |                         |                         | b <sub>6</sub> -H <sub>3</sub> PO <sub>4</sub> (-0.040) |                        | y <sub>6</sub> -H <sub>3</sub> PO <sub>4</sub> (-7.4e-4)              | y <sub>5</sub> (0.032)                                               | y <sub>6</sub> -H <sub>2</sub> O(-0.049) | y <sub>6</sub> (0.014)                                 |

**[-] Main Sequence Ions**

| b-H <sub>3</sub> PO <sub>4</sub> | b-H <sub>3</sub> PO <sub>4</sub> <sup>+2</sup> | b        | b <sup>+2</sup> |   |            | y | y <sup>+2</sup> | y-H <sub>3</sub> PO <sub>4</sub> | y-H <sub>3</sub> PO <sub>4</sub> <sup>+2</sup> |          |
|----------------------------------|------------------------------------------------|----------|-----------------|---|------------|---|-----------------|----------------------------------|------------------------------------------------|----------|
| ---                              | ---                                            | ---      | ---             | 1 | L          | 8 | ---             | ---                              | ---                                            |          |
| ---                              | ---                                            | 242.1863 | 121.5968        | 2 | K          | 7 | 848.4026        | 424.7049                         | 750.4257                                       | 375.7165 |
| ---                              | ---                                            | 329.2183 | 165.1128        | 3 | S          | 6 | 720.3076        | 360.6575                         | 622.3307                                       | 311.6690 |
| ---                              | ---                                            | 426.2711 | 213.6392        | 4 | P          | 5 | 633.2756        | 317.1414                         | 535.2987                                       | 268.1530 |
| ---                              | ---                                            | 523.3239 | 262.1656        | 5 | P          | 4 | 536.2228        | 268.6151                         | 438.2459                                       | 219.6266 |
| 592.3453                         | 296.6763                                       | 690.3222 | 345.6647        | 6 | S(Phospho) | 3 | 439.1701        | 220.0887                         | 341.1932                                       | 171.1002 |
| 689.3981                         | 345.2027                                       | 787.3750 | 394.1911        | 7 | P          | 2 | 272.1717        | 136.5895                         | ---                                            | ---      |
| ---                              | ---                                            | ---      | ---             | 8 | R          | 1 | 175.1190        | 88.0631                          | ---                                            | ---      |

**Phospho-Thr396.** Corresponding phosphopeptide represents [384-401] of HSFA4A (Uniprot ID:O49403)

**NVNAITEQLGHLT(Phospho)SSERS<sup>+2</sup>**

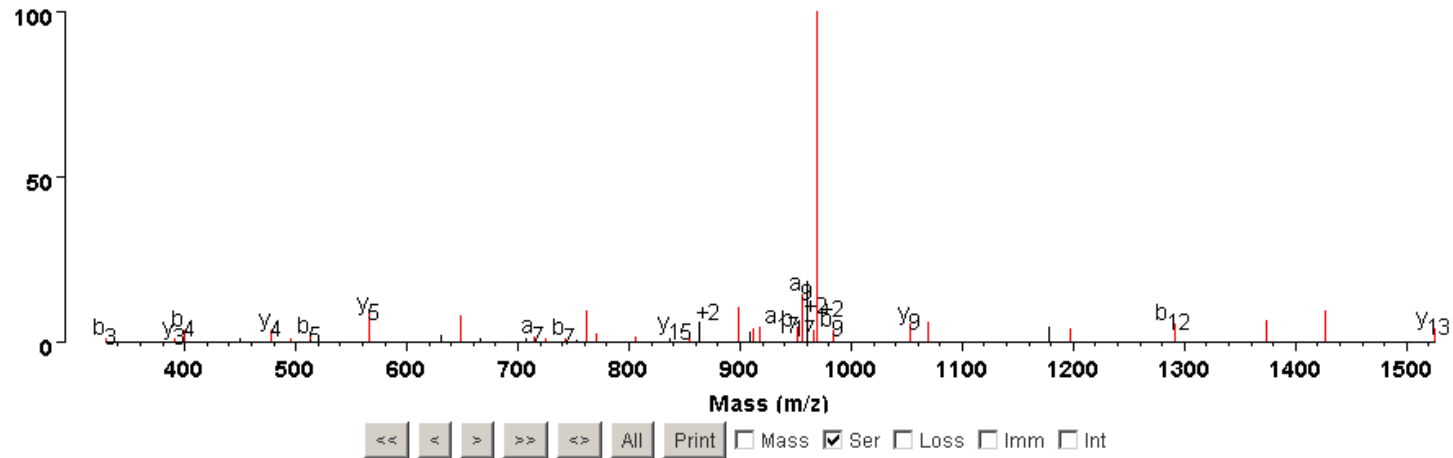

Max Intensity: 15819

Num Matched: 30/40 (25.0% unmatched) Matched Intensity: 85.9% Matched Series Intensity: 78.0%

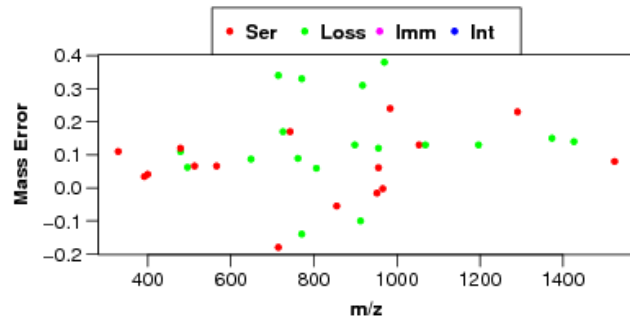

| <input type="checkbox"/>                                                                                                                                                                                            | N Term | Sequence                    | C Term | N Loss |
|---------------------------------------------------------------------------------------------------------------------------------------------------------------------------------------------------------------------|--------|-----------------------------|--------|--------|
| <input checked="" type="checkbox"/>                                                                                                                                                                                 |        | NVNAITEQLGHLT(Phospho)SSERS |        |        |
| [+] Additional Sequences                                                                                                                                                                                            |        |                             |        |        |
| Max Charge <input type="text" value="2"/> Count Basic AA <input type="text"/> Max Losses <input type="text" value="1"/> Multi Z Internal <input type="checkbox"/> Max Internal Len <input type="text" value="200"/> |        |                             |        |        |
| Max MSMS Pks <input type="text"/> Frag Tol <input type="text" value="0.4"/> Da <input type="text"/> Cal <input type="checkbox"/> Cal Tol (Da) <input type="text" value="0.4"/>                                      |        |                             |        |        |
| Centroid <input type="text"/> <b>MS-Product</b> Output <input type="text" value="HTML"/>                                                                                                                            |        |                             |        |        |
| [+] Ion Types                                                                                                                                                                                                       |        |                             |        |        |

Elemental Composition: [C80 H136 N26 O34 P1](#)

| MH <sup>+</sup> 1(av) | MH <sup>+</sup> 1(mono) | MH <sup>+</sup> 2(av) | MH <sup>+</sup> 2(mono) |
|-----------------------|-------------------------|-----------------------|-------------------------|
| 2037.1000             | 2035.9444               | 1019.0537             | 1018.4759               |

**[-] Peak Matches**

| 328.2760                                               | 391.2280               | 399.2400                                                                                       | 450.2190                                               | 478.3480                                                                                     | 495.3180                                                             | 512.3490                                               | 565.3240                                                                                                                        | 630.4660                                                              | 648.3820                                               |
|--------------------------------------------------------|------------------------|------------------------------------------------------------------------------------------------|--------------------------------------------------------|----------------------------------------------------------------------------------------------|----------------------------------------------------------------------|--------------------------------------------------------|---------------------------------------------------------------------------------------------------------------------------------|-----------------------------------------------------------------------|--------------------------------------------------------|
| b <sub>3</sub> (0.11)                                  | y <sub>3</sub> (0.034) | b <sub>4</sub> (0.041)                                                                         |                                                        | y <sub>9</sub> -H <sub>3</sub> PO <sub>4</sub> <sup>+2</sup> (0.11)<br>y <sub>4</sub> (0.12) | b <sub>5</sub> -NH <sub>3</sub> (0.062)                              | b <sub>5</sub> (0.066)                                 | y <sub>5</sub> (0.066)                                                                                                          |                                                                       | y <sub>6</sub> -H <sub>3</sub> PO <sub>4</sub> (0.087) |
| 666.1570                                               | 707.5750               | 714.1940                                                                                       | 725.5170                                               | 742.5440                                                                                     | 753.3540                                                             | 761.4680                                               | 770.7210                                                                                                                        | 805.9690                                                              | 836.4990                                               |
|                                                        |                        | a <sub>7</sub> (-0.18)<br>y <sub>13</sub> -H <sub>3</sub> PO <sub>4</sub> <sup>+2</sup> (0.34) | b <sub>7</sub> -NH <sub>3</sub> (0.17)                 | b <sub>7</sub> (0.17)                                                                        |                                                                      | y <sub>7</sub> -H <sub>3</sub> PO <sub>4</sub> (0.089) | b <sub>14</sub> -H <sub>2</sub> O <sup>+2</sup> (-0.14)<br>y <sub>14</sub> -H <sub>3</sub> PO <sub>4</sub> <sup>+2</sup> (0.33) | y <sub>15</sub> -H <sub>3</sub> PO <sub>4</sub> <sup>+2</sup> (0.059) |                                                        |
| 854.8440                                               | 863.6900               | 898.5710                                                                                       | 908.8650                                               | 912.3660                                                                                     | 917.2800                                                             | 951.9410                                               | 955.5820                                                                                                                        | 960.9070                                                              | 965.9520                                               |
| y <sub>15</sub> <sup>+2</sup> (-0.055)                 |                        | y <sub>8</sub> -H <sub>3</sub> PO <sub>4</sub> (0.13)                                          |                                                        | y <sub>17</sub> -H <sub>3</sub> PO <sub>4</sub> <sup>+2</sup> (-0.100)                       | b <sub>17</sub> -H <sub>3</sub> PO <sub>4</sub> <sup>+2</sup> (0.31) | a <sub>17</sub> <sup>+2</sup> (-0.016)                 | a <sub>9</sub> (0.061)<br>y <sub>9</sub> -H <sub>3</sub> PO <sub>4</sub> (0.12)                                                 |                                                                       | b <sub>17</sub> <sup>+2</sup> (-0.0026)                |
| 969.8710                                               | 983.7520               | 1053.5660                                                                                      | 1068.6740                                              | 1178.7120                                                                                    | 1196.7280                                                            | 1290.9060                                              | 1373.8660                                                                                                                       | 1426.8350                                                             | 1524.7490                                              |
| MH-H <sub>3</sub> PO <sub>4</sub> <sup>+2</sup> (0.38) | b <sub>9</sub> (0.24)  | y <sub>9</sub> (0.13)                                                                          | y <sub>10</sub> -H <sub>3</sub> PO <sub>4</sub> (0.13) |                                                                                              | y <sub>11</sub> -H <sub>3</sub> PO <sub>4</sub> (0.13)               | b <sub>12</sub> (0.23)                                 | b <sub>13</sub> -H <sub>3</sub> PO <sub>4</sub> (0.15)                                                                          | y <sub>13</sub> -H <sub>3</sub> PO <sub>4</sub> (0.14)                | y <sub>13</sub> (0.080)                                |

**[-] Main Sequence Ions**

| b-H <sub>3</sub> PO <sub>4</sub> | b-H <sub>3</sub> PO <sub>4</sub> <sup>+2</sup> | b         | b <sup>+2</sup> |    |            | y  | y <sup>+2</sup> | y-H <sub>3</sub> PO <sub>4</sub> | y-H <sub>3</sub> PO <sub>4</sub> <sup>+2</sup> |          |
|----------------------------------|------------------------------------------------|-----------|-----------------|----|------------|----|-----------------|----------------------------------|------------------------------------------------|----------|
| ---                              | ---                                            | ---       | ---             | 1  | N          | 18 | ---             | ---                              | ---                                            |          |
| ---                              | ---                                            | 214.1186  | ---             | 2  | V          | 17 | 1921.9015       | 961.4544                         | 1823.9246                                      | 912.4659 |
| ---                              | ---                                            | 328.1615  | ---             | 3  | N          | 16 | 1822.8331       | 911.9202                         | 1724.8562                                      | 862.9317 |
| ---                              | ---                                            | 399.1987  | ---             | 4  | A          | 15 | 1708.7902       | 854.8987                         | 1610.8133                                      | 805.9103 |
| ---                              | ---                                            | 512.2827  | ---             | 5  | I          | 14 | 1637.7531       | 819.3802                         | 1539.7762                                      | 770.3917 |
| ---                              | ---                                            | 613.3304  | ---             | 6  | T          | 13 | 1524.6690       | 762.8381                         | 1426.6921                                      | 713.8497 |
| ---                              | ---                                            | 742.3730  | ---             | 7  | E          | 12 | 1423.6213       | 712.3143                         | 1325.6444                                      | 663.3258 |
| ---                              | ---                                            | 870.4316  | ---             | 8  | Q          | 11 | 1294.5787       | 647.7930                         | 1196.6018                                      | 598.8046 |
| ---                              | ---                                            | 983.5156  | ---             | 9  | L          | 10 | 1166.5201       | 583.7637                         | 1068.5432                                      | 534.7753 |
| ---                              | ---                                            | 1040.5371 | ---             | 10 | G          | 9  | 1053.4361       | 527.2217                         | 955.4592                                       | 478.2332 |
| ---                              | ---                                            | 1177.5960 | 589.3016        | 11 | H          | 8  | 996.4146        | 498.7109                         | 898.4377                                       | 449.7225 |
| ---                              | ---                                            | 1290.6801 | 645.8437        | 12 | L          | 7  | 859.3557        | 430.1815                         | 761.3788                                       | 381.1930 |
| 1373.7172                        | 687.3622                                       | 1471.6941 | 736.3507        | 13 | T(Phospho) | 6  | 746.2716        | 373.6395                         | 648.2947                                       | 324.6510 |
| 1460.7492                        | 730.8782                                       | 1558.7261 | 779.8667        | 14 | S          | 5  | 565.2576        | 283.1325                         | ---                                            | ---      |
| 1547.7812                        | 774.3943                                       | 1645.7581 | 823.3827        | 15 | S          | 4  | 478.2256        | 239.6164                         | ---                                            | ---      |
| 1676.8238                        | 838.9156                                       | 1774.8007 | 887.9040        | 16 | E          | 3  | 391.1936        | 196.1004                         | ---                                            | ---      |
| 1832.9250                        | 916.9661                                       | 1930.9018 | 965.9546        | 17 | R          | 2  | 262.1510        | 131.5791                         | ---                                            | ---      |
| ---                              | ---                                            | ---       | ---             | 18 | S          | 1  | 106.0499        | ---                              | ---                                            | ---      |

## Supplemental Methods

### *Analysis of stress tolerance*

For analysis of stress tolerance traits, 5-day-old seedlings were transferred to agar-solidified 0.5 MS medium containing 5  $\mu\text{M}$  estradiol and one of the following supplements: 100 mM NaCl, 5 mM  $\text{H}_2\text{O}_2$ , 0.1 mM  $\text{CdCl}_2$ , 0.1 or 0.3  $\mu\text{M}$  paraquat. Plant growth was monitored by capturing images every 3 days as described (Ruibal, et al., 2012). Rosette size and root elongation of 30 plants were measured at each time point using the ImageJ software ([rsb.info.nih.gov/ij](http://rsb.info.nih.gov/ij)), and average values were determined. Growth rates were calculated from at least four time points using the LINEST function of Microsoft Excel software and normalized to wild type plants.

To compare paraquat tolerance of Arabidopsis lines, seedlings were grown in the presence of 0.3  $\mu\text{M}$  paraquat as indicated above. After two weeks, the anthocyanin-accumulating plants were scored, counting those seedlings that were unambiguously purple-red or showed large colored leaf sections as described by (Kortstee, et al., 2011), and percentage values were calculated.

Anoxia tolerance assay was performed on one-week-old HSFA4ox and wild type plants grown on 0.5 MS media in vertical position. Plants were sprayed with 5  $\mu\text{M}$  estradiol solution and kept under high-purity nitrogen gas flow for 6 and 12 hours in a dark container. Low oxygen conditions were confirmed by testing the induction of two anaerobic marker genes *ALCOHOL DEHYDROGENASE 1 (ADH1, AT1G77120)* and *PYRUVATE DECARBOXYLASE 1 (PDC1, AT4G33070)* in wild type plants. Control plants (air control) were kept in the dark for 6 or 12 hours. Subsequently, plants were transferred to standard growth conditions and survival rates were scored after 7 days. All experiments were performed with two technical replicates and repeated at least 3 times.

### *Gene cloning, vector construction*

All cloning were performed using the Gateway cloning System (Invitrogene) or FastDigest restriction enzymes and T4 DNA ligase (Thermo Scientific) following the manufacturer instructions. cDNA insert from transgenic COS lines were PCR-amplified using genomic



DNA template with the ER8A and ER8B primers (Supplemental Table 3) and Phusion High-Fidelity DNA Polymerase (Thermo Scientific). Identity of the cDNA inserts was determined by sequence homology searches in the TAIR database ([www.arabidopsis.org](http://www.arabidopsis.org)). PCR fragments were cloned into pDONR201 using the Gateway BP clonase reaction, sequenced and moved into the binary vector pER8GW (Papdi et al., 2008) by Gateway LR clonase reaction. The *HSFA4A* (*AT4G18880*) promoter was cloned by amplifying the *HSFA4A* promoter region of 2 kb and cloning it into the pENTRY-BS vector as a *EcoRI-BamHI* fragment (pENTRY-BS vector was constructed using backbone of pENTR/D-TOPO (Invitrogen) in which MCS of pBluescript II (Stratagene) was cloned (kindly donated by T.Sarnowski, Laboratory of Plant Molecular Biology, Institute of Biochemistry and Biophysics, Polish Academy of Sciences, Warsaw). The pHSFA4A-GUS vector was generated by moving the promoter fragment into the binary vector pHGWFS7 (Karimi, et al., 2002) using Gateway LR clonase reaction.

pPCV-YFP-H vector was constructed from the modified pPCV812 vector containing the 35S promoter:mGFP4:NOS cassette (Kircher et al, 2002). The YFP cDNA was PCR-amplified from the pEYFP plasmid template (Clontech) with unique *SmaI* and *SacI* sites at the 5' and 3' termini, respectively. pPCV-YFP-H was produced by replacing the *mGFP4* gene with the amplified YFP fragment in the modified pPCV812 vector via *SmaI* and *SacI* sites. To generate the 35S-HSFA4A-YFP construct, the full-length *HSFA4A* cDNA was cloned into the expression vector pPCV-YFP-H as a *BamHI-SmaI* fragment, generating a *HSFA4A* gene 3' fusion with the YFP coding sequence.

BiFC constructs were prepared by cloning the *HSFA4A* cDNA into the *HindIII* and *SmaI* sites of pSAT1A-nEYFP-N1 and pSAT1A-cEYFP-N1 vectors (<http://www.bio.purdue.edu/people/faculty/gelvin/nsf/index.htm>). For *Agrobacterium*-mediated transient expression, BiFC constructs were subcloned as *HindIII-NotI* fragments into pENTRY-BS and moved into pH2GW7.0 and pK2GW7.0 (Karimi, et al., 2002) by LR clonase reaction.

Site directed mutagenesis of *HSFA4A* cDNA was performed using a two-step PCR amplification method as described (Brons-Poulsen, et al., 1998). To modify conserved Cys residues, a single point mutation into position C229A was introduced using a combination of HsfA4A-5'(Hind III) and 3'C229\_Hsf\_R primers; the resulting mega primer was used with HSFA4A-3' (*SmaI*)\_noSTOP primer to perform the second step PCR. The mutagenized DNA

fragment was cloned into the *HindIII* and *SmaI* sites of pENTRY-BS and sequenced. Further point mutations were consecutively introduced into positions C267A and C295A using the generated constructs as PCR templates. Finally, a PCR product containing all three point mutations in the HSFA4A coding sequence (mHSFA4A) was cloned into BiFC vectors pSAT1A-nEYFP-N1 and pSAT1A-cEYFP-N1 as a *HindIII-SmaI* fragment. To generate the mutant version Ser309HSFA4A (HSFA4m), a single point mutation was introduced in this position, and the PCR product was cloned into the *HindIII* and *SmaI* sites of pSAT1A-cEYFP-N1.

Mass Spectrometry-identified phosphorylation sites were confirmed by introducing point mutations into S198A, T238A, S239A, S309A and T396A following two-step PCR amplification method. Six individual constructs were generated and cloned into the *BamHI* and *HindIII* sites of pMAL-C2, including all combinations of quadruple point mutations and a quintuple mutant.

A PCR fragment of 1100 bp containing the promoter region of *HSP17.6A* (*AT5G12030*) was cloned into pPCV-LUC+ (Toth, et al., 2001) vector as a *EcoRI-Sall* fragment to generate the pHSP17.6A–LUC reporter gene construct.

*MPK3* (*AT3G45640*) and *MPK6* (*AT2G43790*) cDNAs were PCR amplified using Arabidopsis (Col-0) cDNA as template, cloned into the bacterial expression vector pET-28c(+) (Novagen) as *BamHI-Sall* fragments and sequenced, generating the His6-MPK3/6 constructs. To generate the His6-HSFA4A construct, the corresponding cDNA was cloned into the bacterial expression vectors pET-28a(+) as *BamHI-HindIII*. MBP-HSFA4A construct was prepared cloning HSFA4A cDNA into the *BamHI* and *HindIII* sites of pMAL-C2 plasmid (NEB).

To generate yeast two hybrid constructs, MPK3, MPK6, HSFA4A and mHSFA4A coding sequences were cloned into both pGAD424 and pGBT9 vectors (Clontech) as *BamHI-Sall* fragments. To generate transgenic plants, gene constructs were introduced into Arabidopsis plants using an *in planta* transformation method (Clough, et al., 1998). Expression of inserted cDNA was tested by RT-PCR, and two overexpressing lines (HSFA4ox1 and HSFA4ox2) and one complemented mutant line (*hsfa4a/C*) were selected for further phenotypic analysis.

### ***Analysis of gene expression***

Transcript levels were monitored by real time (qRT-PCR) and semi-quantitative RT-PCR analyses. cDNA templates were generated from DNase-treated (Promega) total RNA (2 µg) samples by reverse transcription using SuperScript™ II RNase H<sup>-</sup> reverse transcriptase (Invitrogen). Real time RT-PCR reactions were prepared with SYBR® Green JumpStart™ Taq ReadyMix™ (Sigma) employing the following protocol: denaturation 95°C/10 min, 40 to 45 cycles of 95°C/10 sec and 60°C/1 min, with ABI PRISM 7700 sequence detection system (Applied Biosystems, Foster City, CA, USA). Semi-quantitative PCR reactions were performed in 50 µL volume, using 0.2 µg cDNA template and Dupla-Taq™ polymerase (Zenon Bio, Szeged) employing the following protocol: denaturation 94°C/2 min, 35 cycles of 94°C/30 sec, 60°C/45 sec, and 72°C/1 min. *TUBULIN2* (*AT5G62690*) and *GAPC2* (*AT1G13440*) genes were used as internal references. Sequences of PCR primers are listed in Table S5.

### ***RNA-Seq Analysis***

Total RNA was isolated using RNeasy kits (Qiagen). Total RNA (10 µg) was DNase I-treated with Turbo DNase (Ambion), precipitated with sodium acetate/ethanol and resuspended in nuclease-free water. RNA quality and quantity measurements were performed on Bioanalyzer (Agilent Technologies) and Qubit (Life Technologies). High quality (RIN>8.5) total RNA samples were processed using the SOLiD total RNA-Seq Kit (Life Technologies), according to the manufacturer's instructions. Briefly, 5 µg of RNA was ribosomal RNA depleted using RiboMinus Plant Kit for RNA-Seq and RiboMinus Concentration Module (both from Life Technologies). The leftover was fragmented using RNaseIII, the 50-200 nt fraction size-selected, sequencing adaptors ligated and the templates reverse transcribed using ArrayScript RT. The cDNA library was purified with Qiagen MinElute PCR Purification Kit (Qiagen) and size-selected on a 6% TBE-Urea denaturing polyacrylamide gel. The 150-250 nt cDNA fraction was amplified using AmpliTaq polymerase and purified by AmPureXP Beads (Agencourt). Concentration of each library was determined using the SOLiD Library TaqMan Quantitation Kit (Life Technologies). Each library was clonally amplified on SOLiD P1 DNA Beads by emulsion PCR (ePCR). Emulsions were broken with butanol and ePCR beads enriched for template-positive beads by hybridization with magnetic enrichment beads. Template-enriched beads were extended at the 3' end in the presence of terminal transferase and 3' bead linker. Beads with the clonally amplified DNA were deposited onto SOLiD

sequencing slide and sequenced on SOLiD 5500xl Instrument using the 50-base sequencing chemistry.

Bioinformatic analysis of the RNA-Seq data was performed in colour space using Genomics Workbench 4.7.2 (CLC Bio). Raw sequencing data were trimmed by removal of low quality, short sequences so that only 50 nucleotide long sequences were used in further analysis. Sequences were mapped in a strand-specific way onto the TAIR10 version of the *A. thaliana* reference genome, using default parameters except for the following: minimum length 50%, minimum similarity 80% with the unspecific match limit set to 10. After alignment of RNA-Seq reads to the reference genome, the digital expression levels (RPKM, reads per kilobase of exon model per million mapped reads; (Mortazavi, et al., 2008) of each annotated AGI genes were calculated. To identify significantly altered gene expressions in between samples we used the RNA-Seq analysis option of the Genomics Workbench and applied Baggerley's and Kal's test with Bonferroni and FDR correction.

### ***Mass Spectrometry***

All MS data were acquired on an Orbitrap-Elite mass spectrometer (Thermo Scientific) on-line coupled to a Waters nanoAcquity HPLC. Samples were injected onto a trapping column (Waters Symmetry C18, 0.180mm ID\*20mm length, 5µm particle size) with 3% solvent B at 10 µl/min than were transferred onto the separating column (Waters BEH300 C18, 0.075 mm ID\*150 mm length, 1.75 µm particle size) using a linear gradient of 10-40% solvent B in 30 min at 400 nl/min. Solvent A: 0.1% formic acid / water, solvent B: 0.1% formic acid / acetonitrile. MS data acquisition was carried out in data-dependent fashion, precursor masses were measured in the Orbitrap; sequential CID and HCD spectra were acquired from the computer-selected 3 most abundant multiply charged precursor ions. CID experiments were performed with wideband activation, and the fragments were measured in the linear ion trap. HCD activation was carried out applying stepped normalized collision energy of 18% and 30%, and the fragments were measured in the Orbitrap (Medzihradszky, et al., 2009). Dynamic exclusion was enabled (mass width: ± 5 ppm), exclusion time: 60 s.

Peak picking was carried out by the PAVA software (Guan et al., 2011) and the resulting data were searched with Protein Prospector search engine (v.5.10.9.) and the resulting data were searched with Protein Prospector search engine (v.5.10.9.) using the

following parameters: database: Swissprot (2012.03.21. version, 535248 entries searched); enzyme: trypsin with maximum 1 missed cleavage site; fixed modifications: carbamidomethyl (Cys); variable modifications: acetyl (protein N-term), Gln->pyro-Glu (N-term Gln), oxidation (Met); mass accuracy:  $\pm 5$  ppm for precursors and  $\pm 0.4$  Da and  $\pm 10$  ppm for fragment ions for CID and HCD, respectively; instrument type: ESI-TRAP for CID and Q-TOF for HCD data. As acceptance criteria we used the following settings: score=22 and 15; E value= 0.01 and 0.05 for protein and peptide identifications, respectively and SLIP score (as measure of site assignment reliability) was set to the 95% cut-off value, i.e. to 6 (Baker et al., 2011). After confidently identifying the protein of interest in the nonenriched samples, database search was repeated on the sequence of the MBP-HSFA4A fusion protein allowing phosphorylation on Ser/Thr/Tyr as variable modification (max. 4 variable modifications/peptide) and maximum 2 missed cleavages. Peptide fragments are labeled according to the established nomenclature (Biemann, 1990).

### Supplemental References

**Baker PR, Trinidad JC, Chalkley RJ** (2011) Modification site localization scoring integrated into a search engine. *Mol Cell Proteomics* **10**: M111 008078

**Biemann K** (1990) Appendix 5. Nomenclature for peptide fragment ions (positive ions). *Methods Enzymol* **193**: 886-887

**Brons-Poulsen J, Petersen NE, Horder M, Kristiansen K** (1998) An improved PCR-based method for site directed mutagenesis using megaprimers. *Mol Cell Probes* **12**: 345-348

**Clough SJ, Bent AF** (1998) Floral dip: a simplified method for *Agrobacterium*-mediated transformation of *Arabidopsis thaliana*. *Plant J* **16**: 735-743

**Guan S, Price JC, Prusiner SB, Ghaemmaghami S, Burlingame AL** (2011) A data processing pipeline for mammalian proteome dynamics studies using stable isotope metabolic labeling. *Mol Cell Proteomics* **10**: M111 010728

**Karimi M, Inze D, Depicker A** (2002) GATEWAY vectors for *Agrobacterium*-mediated plant transformation. *Trends Plant Sci* **7**: 193-195

- Kircher S, Gil P, Kozma-Bognar L, Fejes E, Speth V, Husselstein-Muller T, Bauer D, Adam E, Schafer E, Nagy F** (2002) Nucleocytoplasmic partitioning of the plant photoreceptors phytochrome A, B, C, D, and E is regulated differentially by light and exhibits a diurnal rhythm. *Plant Cell* **14**: 1541-1555
- Kortstee AJ, Khan SA, Helderman C, Trindade LM, Wu Y, Visser RG, Brendolise C, Allan A, Schouten HJ, Jacobsen E** (2011) Anthocyanin production as a potential visual selection marker during plant transformation. *Transgenic Res* **20**: 1253-1264
- Medzihradzky, K. F., Chalkley, R. J., Trinidad, J. C., Michaelevski, A., and Burlingame, A. L.** (2008) The utilization of Orbitrap higher collision decomposition device for PTM analysis and iTRAQ-based quantitation. 56th ASMS Conference on Mass Spectrometry, Denver, CO.USA.
- Mortazavi A, Williams BA, McCue K, Schaeffer L, Wold B** (2008) Mapping and quantifying mammalian transcriptomes by RNA-Seq. *Nat Methods* **5**: 621-628
- Papdi C, Abraham E, Joseph MP, Popescu C, Koncz C, Szabados L** (2008) Functional identification of Arabidopsis stress regulatory genes using the controlled cDNA overexpression system. *Plant Physiol* **147**: 528-542
- Ruibal C, Salamo IP, Carballo V, Castro A, Bentancor M, Borsani O, Szabados L, Vidal S** (2012) Differential contribution of individual dehydrin genes from *Physcomitrella patens* to salt and osmotic stress tolerance. *Plant Sci* **190**: 89-102
- Toth R, Kevei E, Hall A, Millar AJ, Nagy F, Kozma-Bognar L** (2001) Circadian clock-regulated expression of phytochrome and cryptochrome genes in Arabidopsis. *Plant Physiol* **127**: 1607-1616
- van Dongen JT, Roeb GW, Dautzenberg M, Froehlich A, Vigeolas H, Minchin PE, Geigenberger P** (2004) Phloem import and storage metabolism are highly coordinated by the low oxygen concentrations within developing wheat seeds. *Plant Physiol* **135**: 1809-1821
